# Supplementary material for: Bifurcation drives the evolution of assembly-line biosynthesis
Source: Springer Nature journal article supplement (doi:10.1038/s41467-022-30950-z), 2022-06-17
Supplement: MOESM1 [file 41467_2022_30950_MOESM1_ESM.pdf]

## Supplementary Information

### Bifurcation Drives the Evolution of Assembly-Line Biosynthesis

Thomas J. Booth, Kenan A. J. Bozhüyük, Jonathon D. Liston, Sibyl F. D. Batey, Ernest Lacey & Barrie Wilkinson\*

#### Contents

|                                          |           |
|------------------------------------------|-----------|
| <b>1. Supplementary Figures</b> .....    | <b>2</b>  |
| <b>2. Supplementary Tables</b> .....     | <b>16</b> |
| <b>3. Supplementary References</b> ..... | <b>31</b> |

## 1. Supplementary Figures

### 1.1 Supplementary Figure 1: Cluster Maps of Hexapeptide producing BGCs

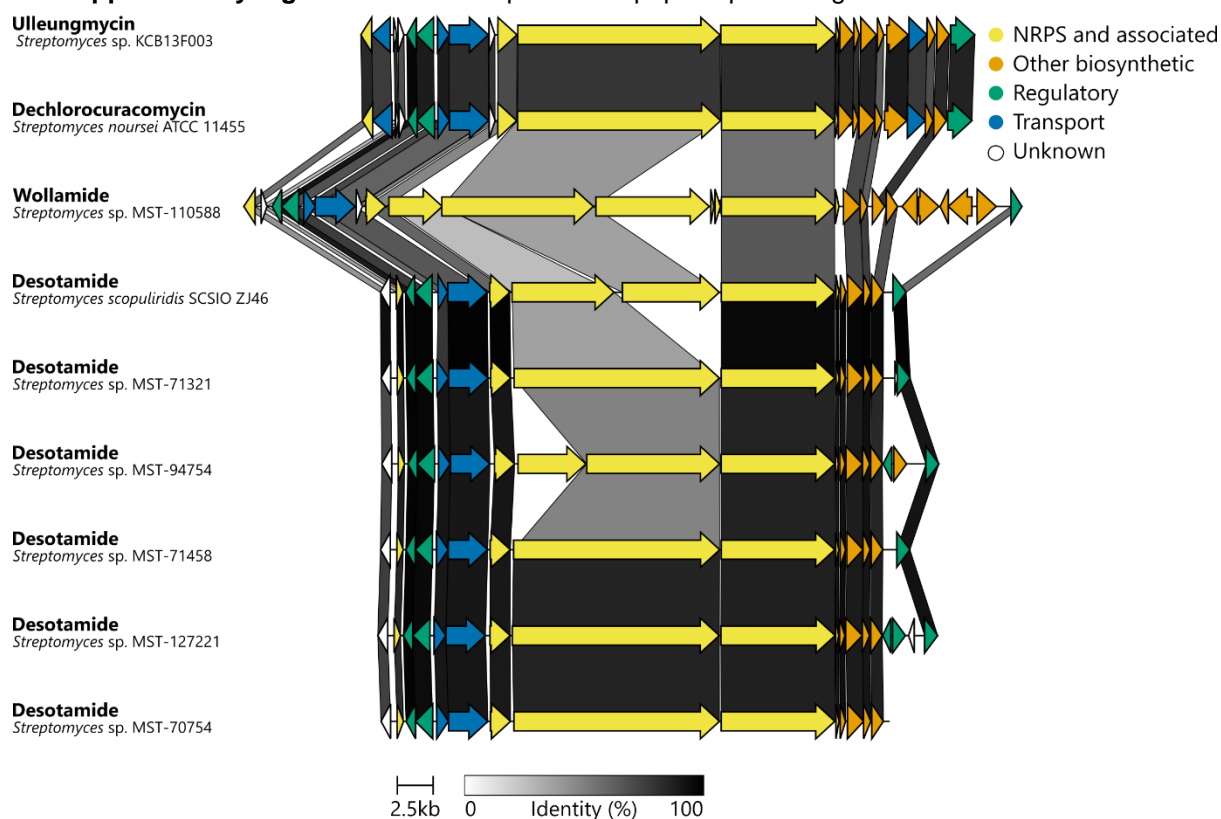

Comparison of hexapeptide producing strains from the Microbial Screening Technologies collection (MST-110588, MST-71321, MST-94754, MST-127221 and MST-70754 (this study)) and previously published hexapeptide BGCs for desotamide<sup>1</sup>, dechlorocuracomycin<sup>2</sup> and ulleungmycin<sup>3</sup>. Figure adapted from clinker output<sup>4</sup>.

## 1.2 Supplementary Figure 2: Plasmid Map of pBO1.

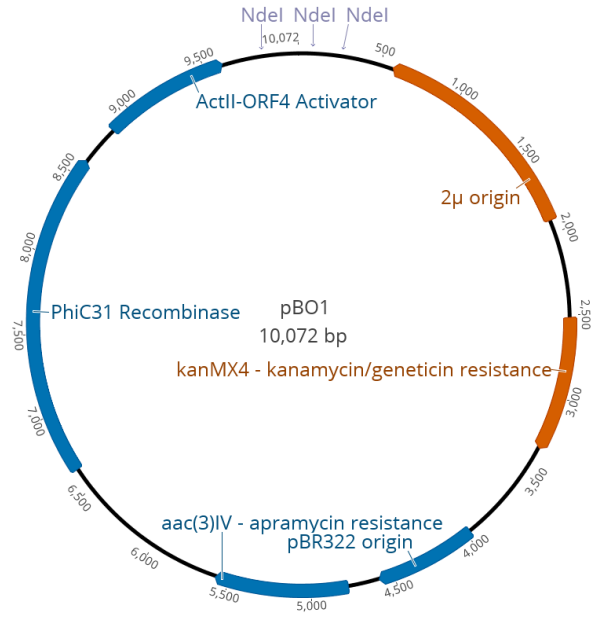

Regions derived from pGP9<sup>5</sup> are coloured blue; those derived from pFF62A<sup>6</sup> are coloured red.

**1.3 Supplementary Figure 3: TICs and EICs of desotamide A and wollamide A standards and producing strains.**

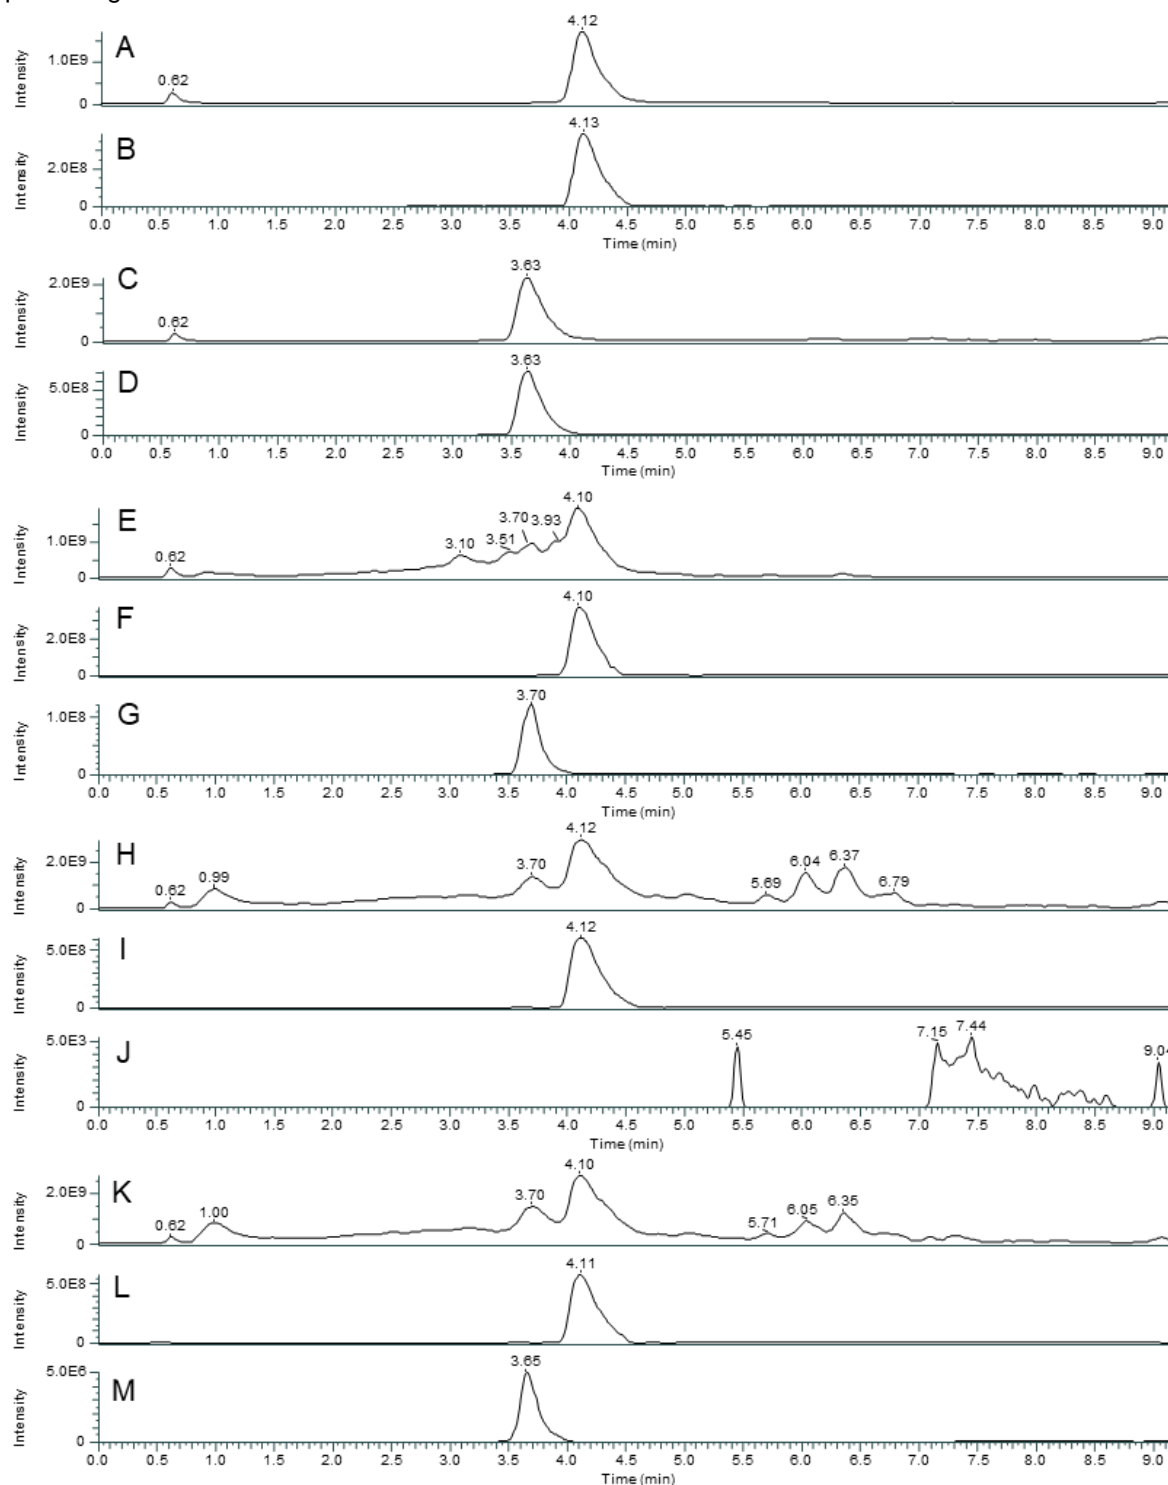

Total ion chromatograms (TIC) and extracted ion chromatograms (EIC) showing the following: A: TIC of desotamide A standard; B: EIC of desotamide A standard ( $[M+H]^+ = 697.40$ ); C: TIC of wollamide A standard; D: EIC of wollamide A standard ( $[M+H]^+ = 754.46$ ); E: TIC from 110588 extract; F: EIC of desotamide A (697.40) from 110588 extract; G: EIC of wollamide A (754.46) in 110588 extract; H: TIC of 70754 extract; I: EIC of desotamide A (697.40) from 70754 extract; J: EIC of wollamide A (754.46) from 70754 extract (noise); K: TIC of 70754/pBO1-wo/G2 extract; L: EIC of desotamide A (697.40) from 70754/pBO1-wo/G2 extract; M: EIC of wollamide A (754.46) from 70754/pBO1-wo/G2 extract.

### 1.4 Supplementary Figure 4: Average mass spectra for desotamide A and wollamide A peaks

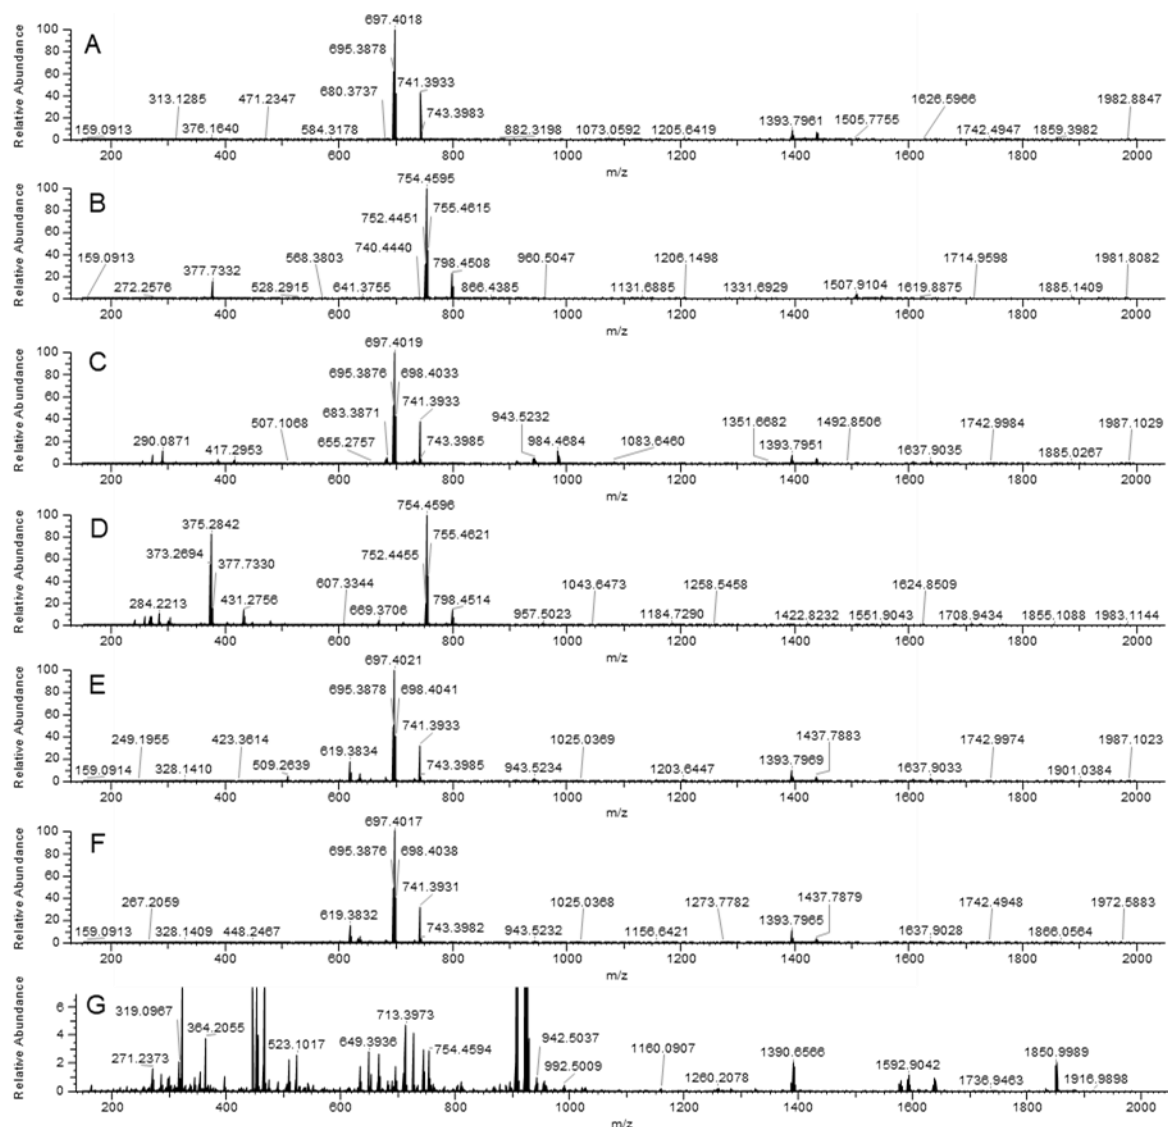

Mass spectra averaged across the peaks in Supplementary Figure 3. A: desotamide A standard; B: wollamide A standard; C: 110588 desotamide A; D: 110588 wollamide A; E: 70754 desotamide A; F: 70754/pBO1-wolG2 desotamide A; G: 70754/pBO1-wolG2 wollamide A. Note: Spectra G is amplified due to overlapping peaks.

## 1.5 Supplementary Figure 5: MS/MS fragmentation of desotamide A and wollamide A

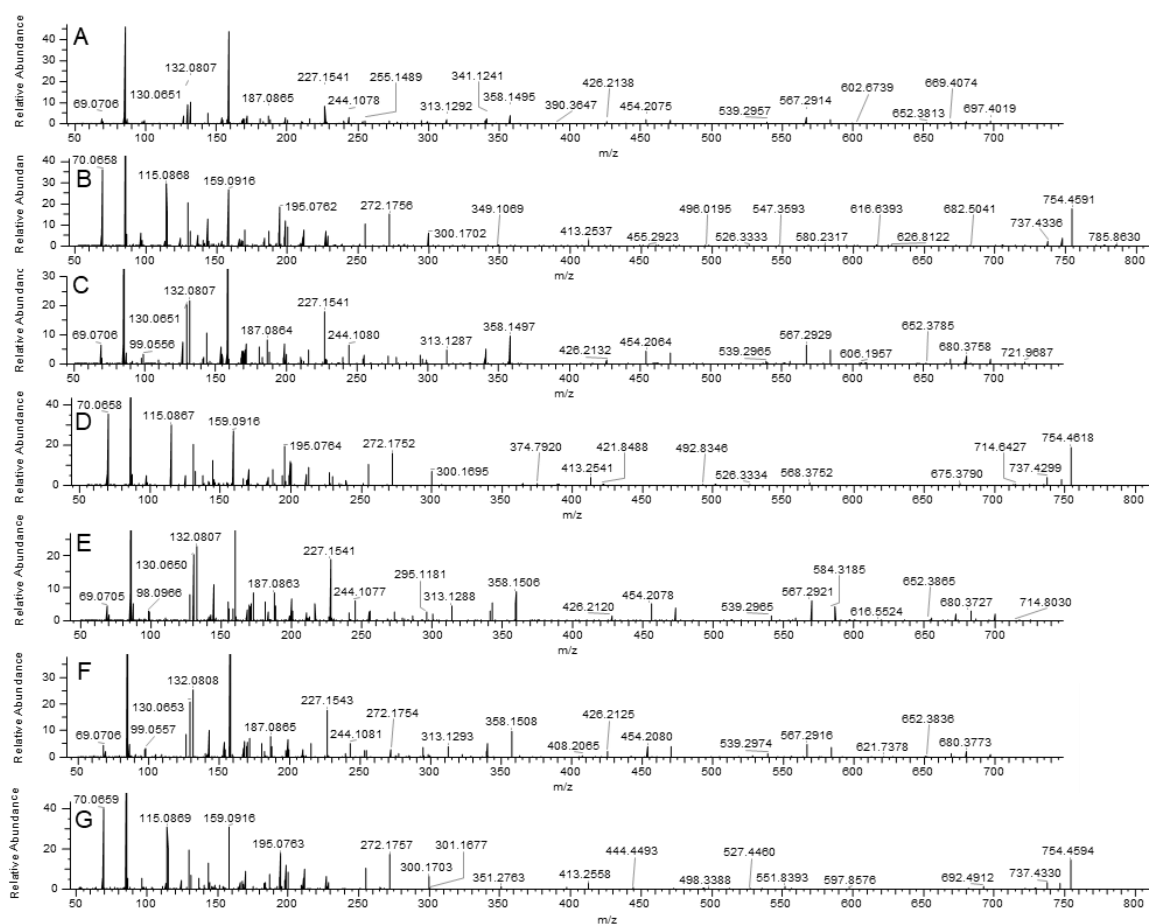

MS/MS fragmentation of desotamide A and wollamide A. A: desotamide A standard; B: wollamide A standard; C: desotamide A from 110588 extracts; D: wollamide A from 110588 extracts; E: desotamide A from 70754 extracts; F: desotamide A from 70754/pBO1-wo/G2; G: wollamide A from 70754/pBO1-wo/G2.

**1.6 Supplementary Figure 6:** Sequences of docking-domain complexes used for homology modeling.

**6TRP\_1|Chain**

MNINEQTLDKLRQAVLQKKIKERIQNSLSTEKY **GSGSGSGSGSGSGSGSGSGSGSGSGY**  
QIETFFAQDIESVQKELENLSEEELLAMLNGDQQ 93

**WolG1 NDD – linker - WolH CDD**

MDAAAARESWIQSLP**E**HVRDRMR SRLTGG AQDG **GSGSGSGSGSGSGSGSGSGSGSGSGY**  
EIFMIDLPA**R**TLFDNPTVADLAAAVEAQVLAELS 93

**WolG2 NDD -linker - WolH CDD**

MDAAASRESWIQSLP**A**HVRDRMR SRLAGGAEAG **GSGSGSGSGSGSGSGSGSGSGSGSGY**  
EIFMIDLPA**R**TLFDNPTVADLAAAVEAQVLAELS 93

Specific interactions between different proteins in NRPS systems are mediated by short C- and N-terminal docking domains (<sup>C/N</sup>DDs). The solution structure 6TRP\_1 (PaxC\_NDD–PaxB\_CDD) was used as a template<sup>7</sup> to model both WolG1\_NDD–WolH\_CDD and WolG2\_NDD–WolH\_CDD. As artificial linking of the PaxB/PaxC DD pair via a flexible glycine-serine (GS) linker led to the elucidation of the structure of the DD complex by NMR spectroscopy, we applied an analogous in silico approach for homology modeling. Left: N-terminal DD; Center: GS linker; Right: C-terminal DD. Proposed key interaction of the WolG1 WolH DD pair (red) that is missing in the WolG2 WolH pair (blue) is highlighted (c.f. Supplementary Figure S7).

**1.7 Supplementary Figure 7:** Homology models of WolH/WolG docking-domain complexes.

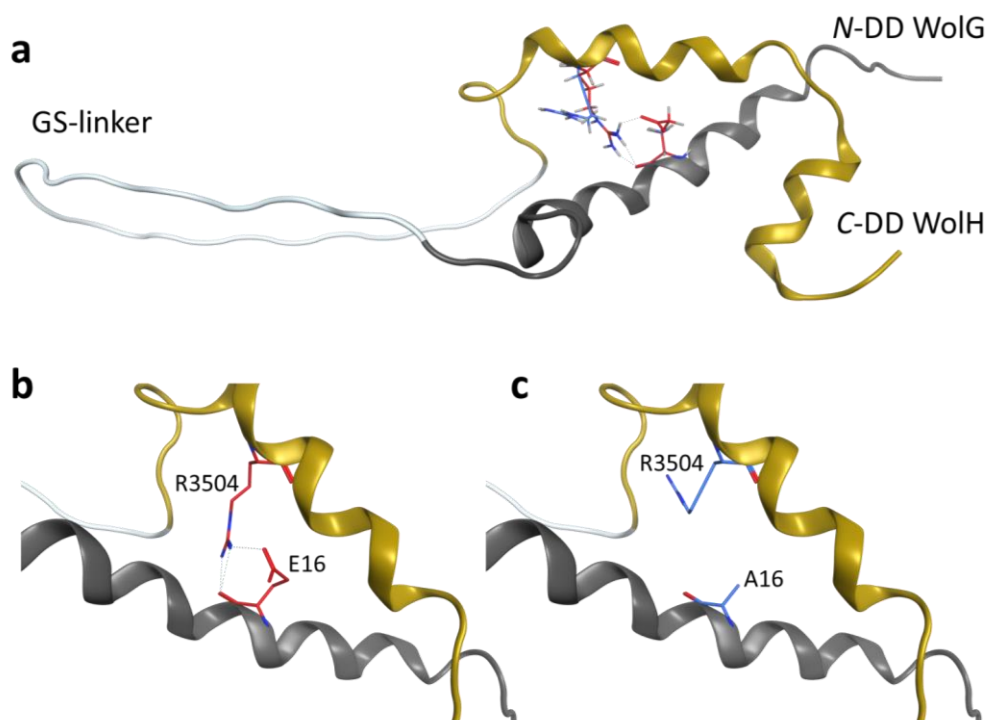

Homology models were calculated to reveal the reason for observed differences in desotamide and wollamide peptide titers. The WolG1 and WolG2 DDs are colored grey, the WolH DDs are colored yellow, and the artificial GS linker are colored white. Depicted amino acid residues (stick representation) are colored as introduced in Supplementary Figure S6. (a) Superimposed models of WolG1 WolH and WolG2 WolH DD pairs have an RMSD of 0.051. (b) Excised WolG1 WolH DD pair. Amino acid residues E16 (WolH) and R3504 (WolG1) are forming a salt bridge. (c) Excised WolG2 WolH DD pair. The E16A amino acid change in WolG2 likely causes decreased DD pair affinities. This in turn may serve as an explanation for lower wollamide titers compared to desotamide titers.



1.8 Supplementary Figure 8: Pairwise identity and comparative GC-Skew of WolG1 and WolG2

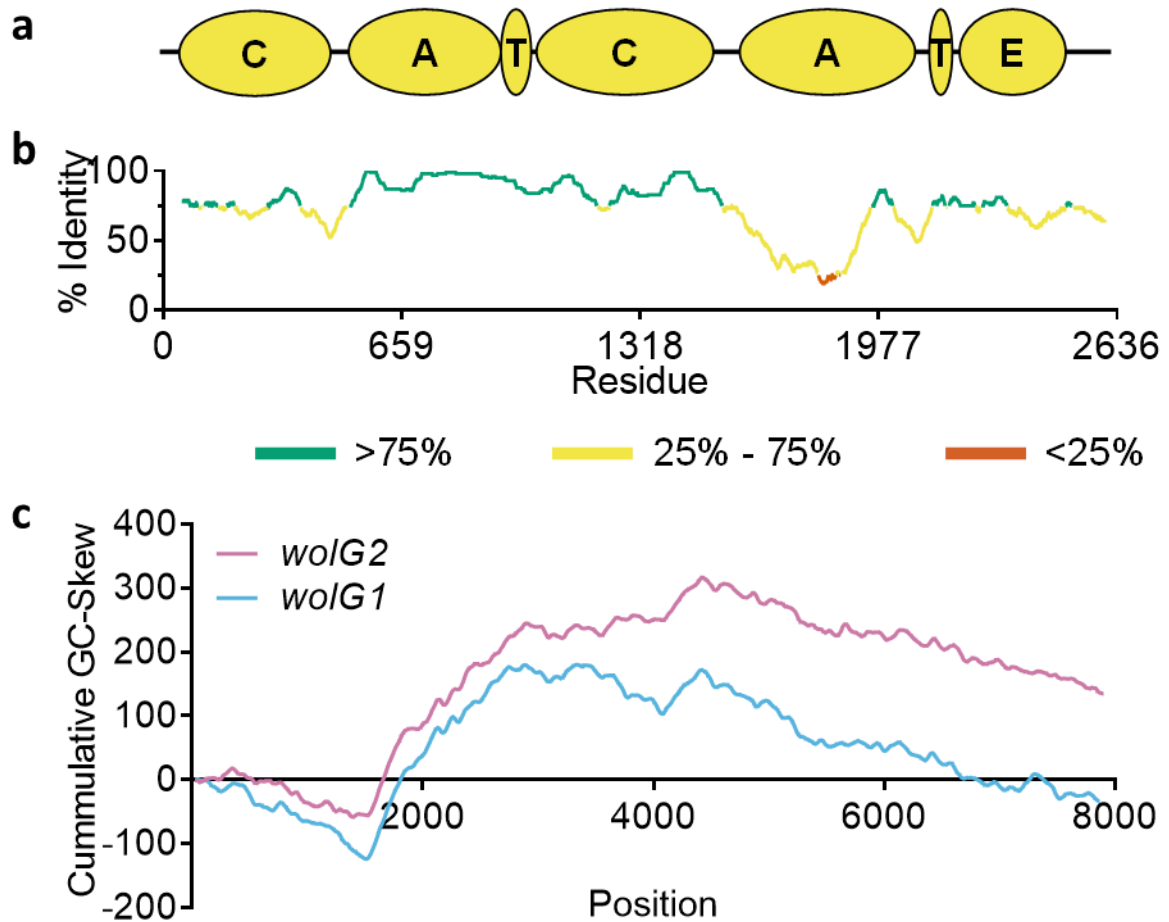

a) The domain architecture of WolG1 is shown across the top of the figure with the domains denoted as follows: condensation (C), adenylation (A), thiolation/peptidyl carrier protein (T) and, epimerase (E). b) The pairwise amino acid identity of WolG1 and WolG2 calculated as a 50-residue sliding window, colour coded as follows: regions of high homology (>75%) are coloured in green, medium homology in yellow (25 -75%) and low homology in red (<25%). c) The cumulative GC-skew measured across *wolG1* and *wolG2*.

**1.9 Supplementary Figure 9: Phylogeny of *Streptomyces* sp. MST-110588 Condensation domains**

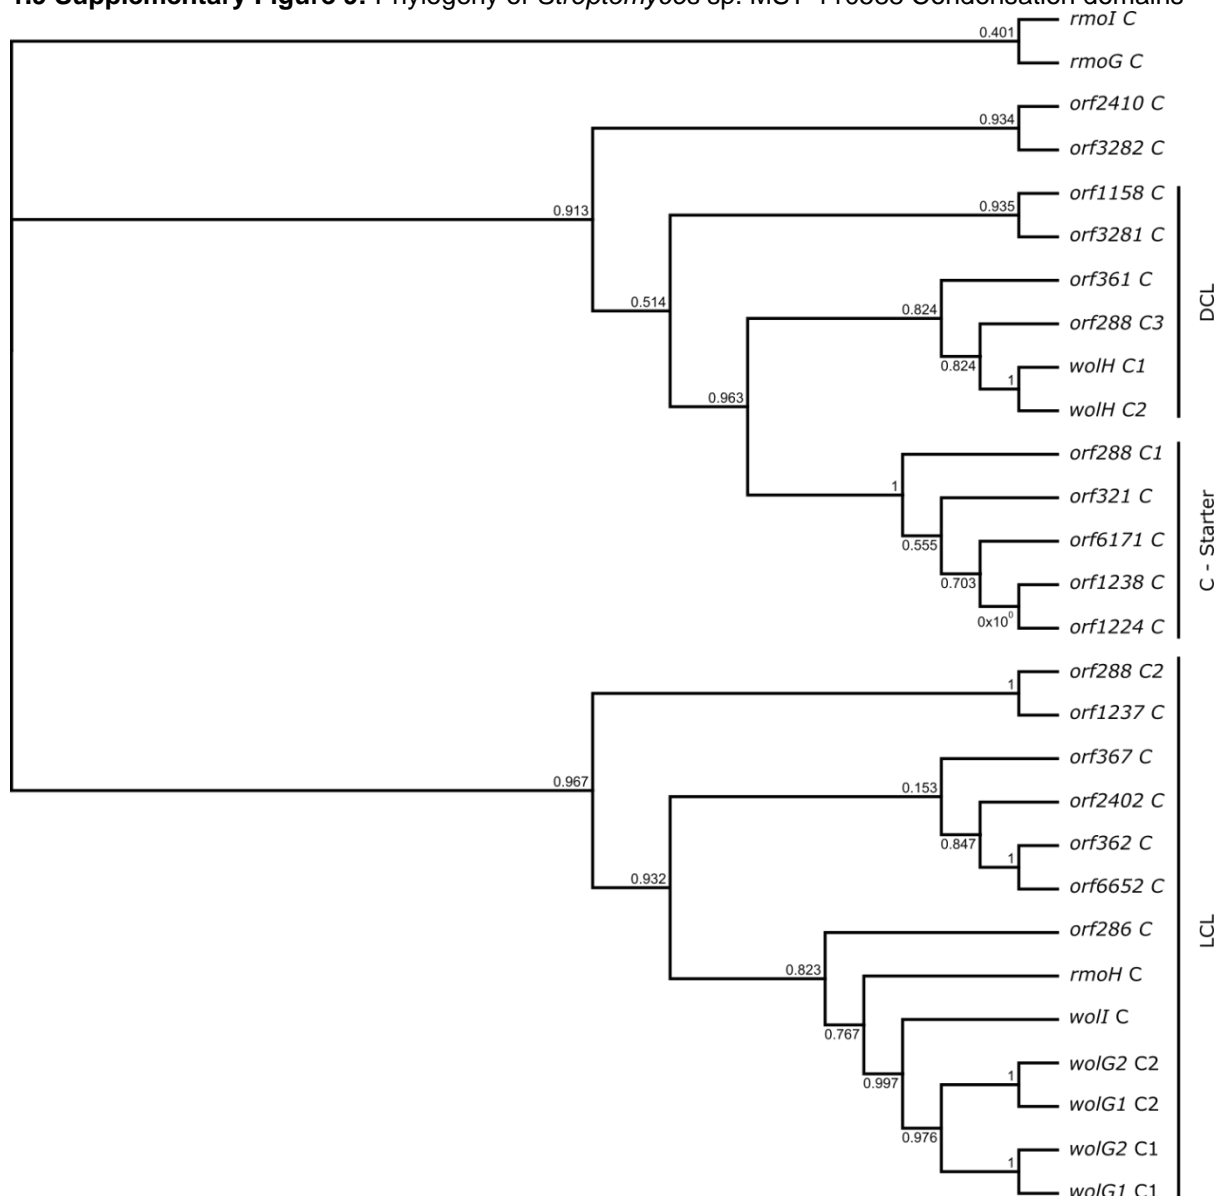

Phylogenetic tree of MST-110588 condensation domains generated by maximum likelihood as implemented in FastTree2<sup>8</sup> from a ClustalW<sup>9</sup> alignment of nucleotide sequences. Condensation domain functions were predicted by NaPDoS<sup>10</sup> major clades are indicated (<sup>L</sup>C<sub>L</sub>s, which condense two L-amino acid residues; <sup>D</sup>C<sub>L</sub>s that condense a D-amino acid residues with L-amino acid residues and; C Starter domains, associated with the loading modules of NRPSs).

**1.10 Supplementary Figure 10: Phylogeny of *Streptomyces* spp. Adenylation domains (recombinant region)**

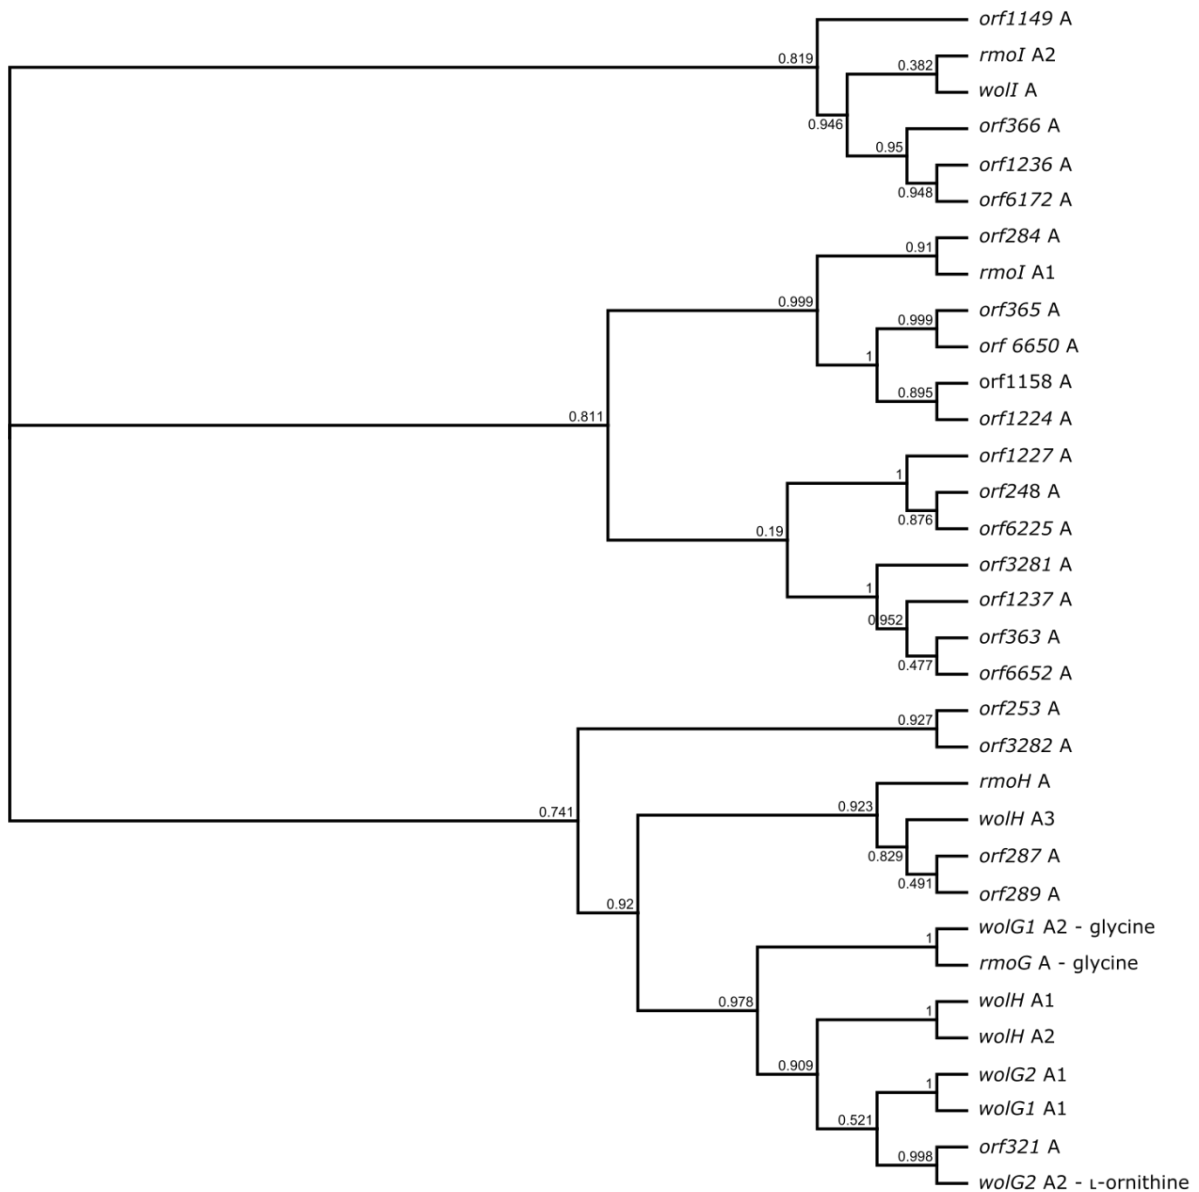

Phylogenetic tree of the *wolG1/wolG2/RmoG* recombinant region of MST-110588 adenylation domains (as predicted by RDP4) generated by maximum likelihood as implemented in FastTree<sup>8</sup> from a ClustalW<sup>9</sup> alignment of nucleotide sequences. Observed substrate specificities encoded by *wolG1*, *wolG2* and *rmoG* are indicated.

**1.11 Supplementary Figure 11: Phylogeny of *Streptomyces* spp. Adenylation domains (parental region)**

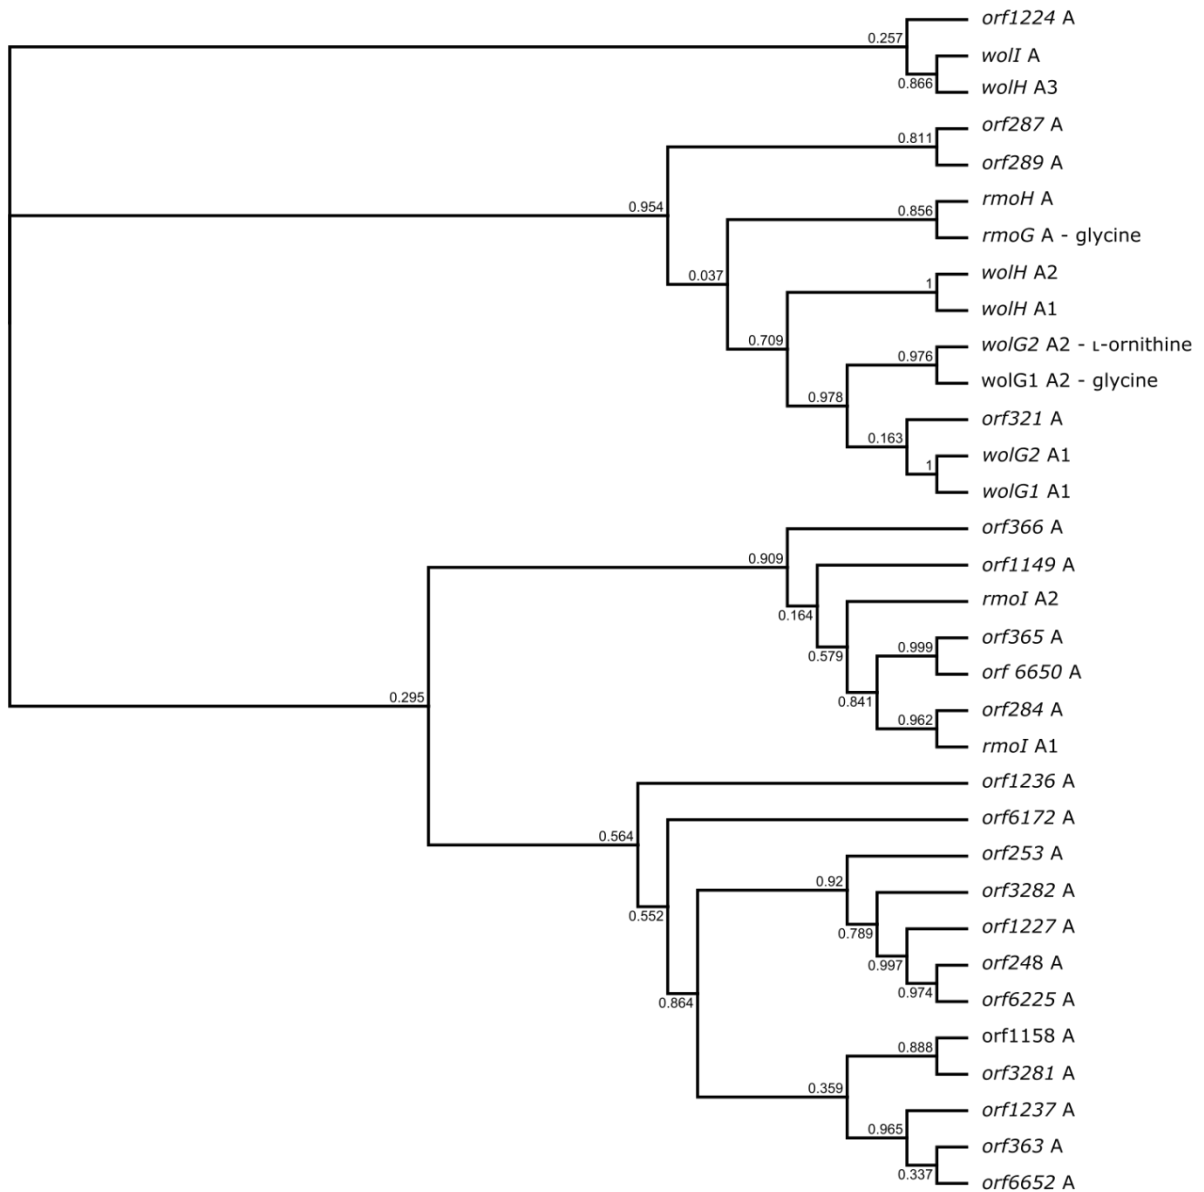

Phylogenetic tree of the of MST-110588 adenylation domains with the *wolG1/wolG2/rmoG* recombinant region removed, generated by maximum likelihood as implemented in FastTree<sup>8</sup> from a ClustalW<sup>9</sup> alignment of nucleotide sequences. Observed substrate specificities encoded by *wolG1*, *wolG2* and *rmoG* are indicated.

**1.12 Supplementary Figure 12:** Topology of a typical adenylation domain showing predicted recombination breakpoints

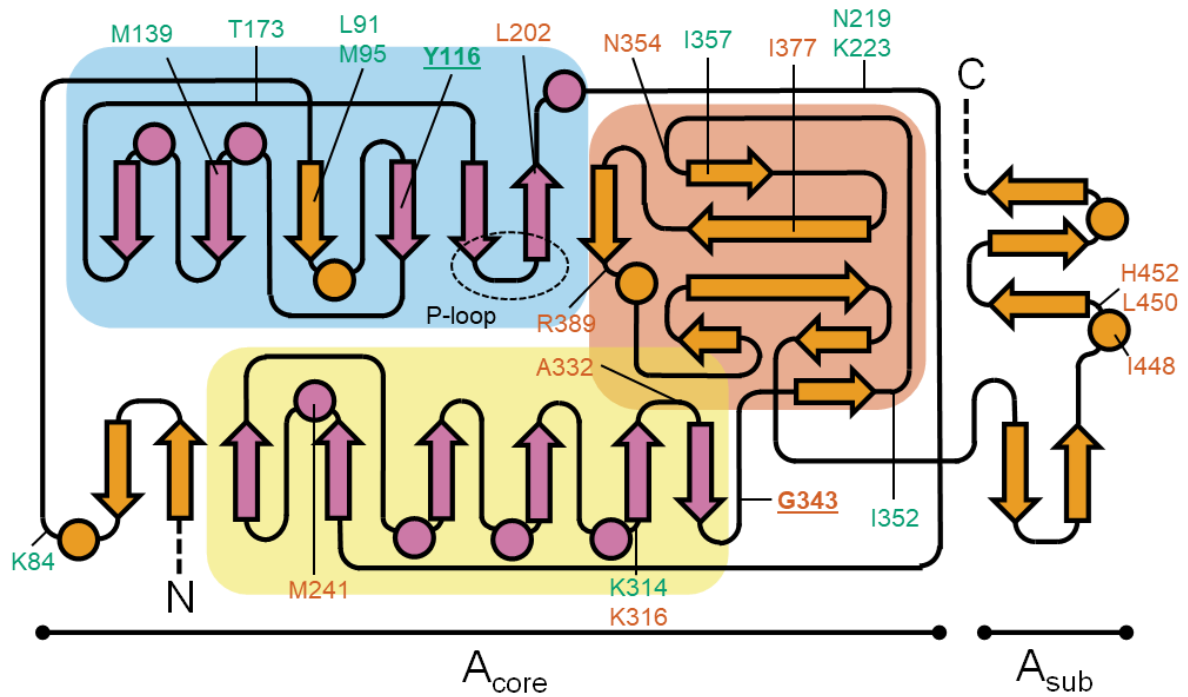

Topology of a typical adenylation domain as reported by Conti et al.<sup>11</sup>. Circles represent  $\alpha$ -helices, arrows represent  $\beta$ -strands, and lines represent loops. Regions corresponding to the large *N*-terminal domain ( $A_{core}$ ) and small *C*-terminal domain ( $A_{sub}$ ) are highlighted and subdomains shaded (subdomain 1 = blue; subdomain 2 (flavodoxin-like subdomain) = yellow; subdomain 3 = red). The residues indicated correspond to approximate sites of recombination from Supplementary Table 9 (green = *N*-terminal; red = *C*-terminal). Recombinant region of *wolG1* coloured in purple and associated breakpoints are underlined.

**1.13 Supplementary Figure 13: Homology model of the final module of WolG1**

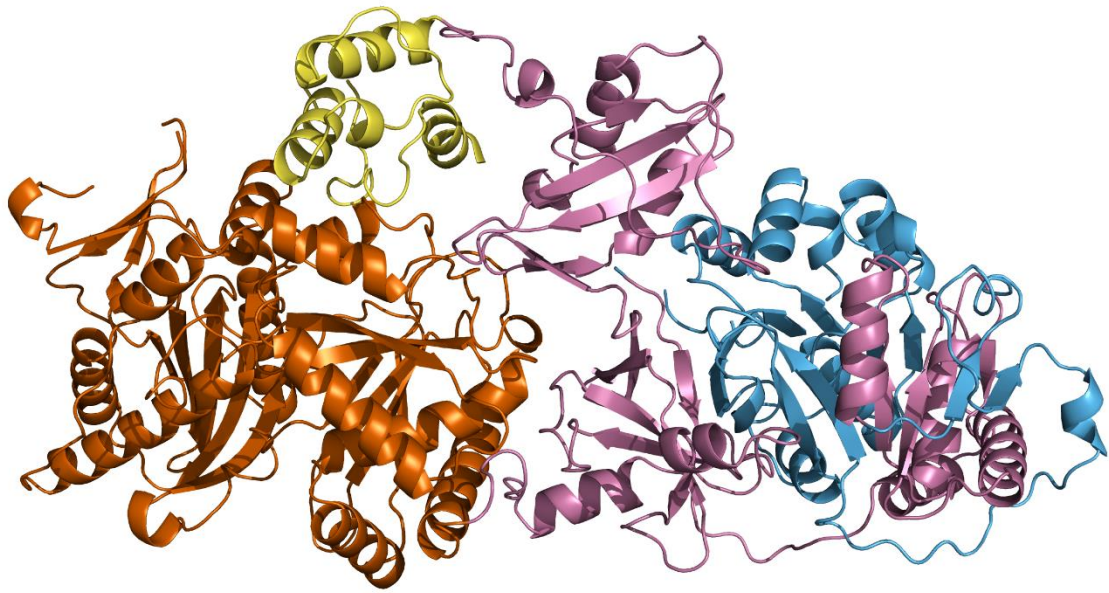

Homology model of WolG1 made with Phyre2<sup>12</sup> based on the structure of surfactin synthetase (PDB: 2VSQ)<sup>13</sup>. The condensation and thiolation domains are coloured orange and yellow, respectively. The adenylation is coloured pink, with the recombinant region coloured in blue.

**1.14 Supplementary Figure 14:** The evolutionary relationships of the desotamides, wollamides and rimosamides.

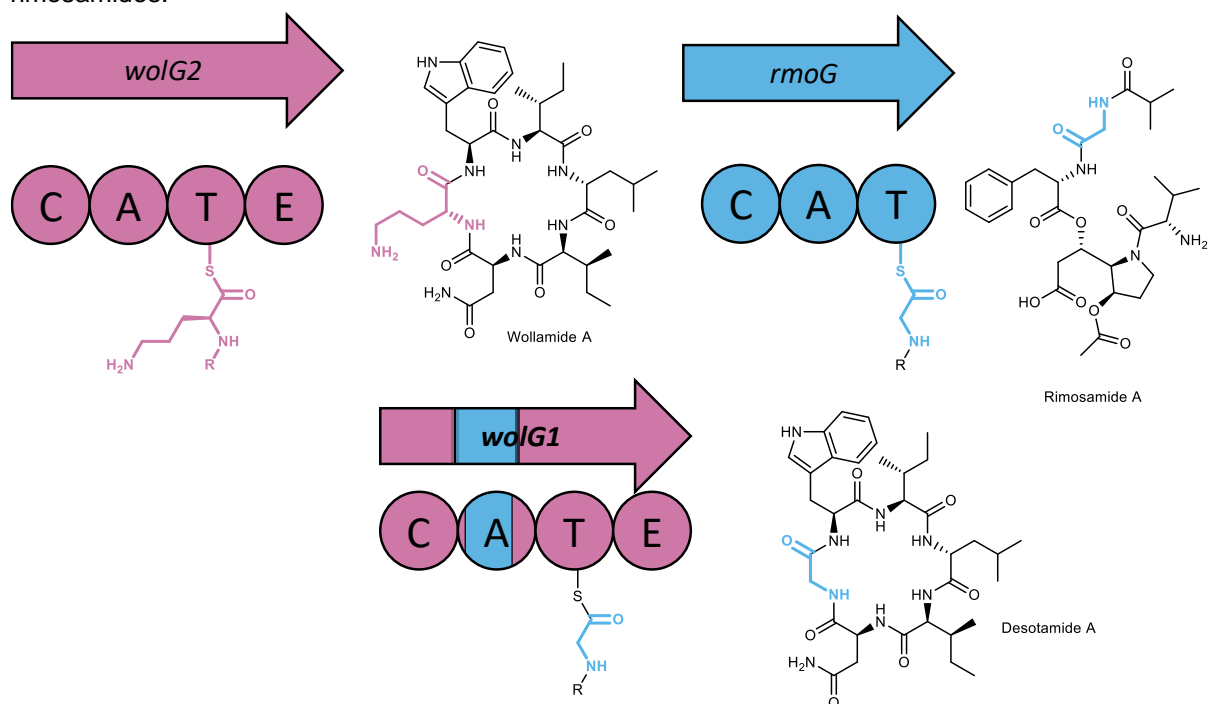

The condensation (C), adenylation (A), thiolation (T) and epimerization (E) domain architecture of the final modules of the WolG1/WolG2 NRPS assembly line enzymes are shown (R corresponds to the preceding residues of the NRPS bound peptides). Wollamide NRPS shown in pink, rimosamide NRPS shown in blue.

## 2. Supplementary Tables

**2.1 Supplementary Table 1:** Genome assembly information for Microbial Screening Technology (MST) *Streptomyces* spp. strains sequenced in this study

---

|                            | <b>MST-7054</b> | <b>MST-71321</b> | <b>MST-71458</b> | <b>MST-94754</b> | <b>MST-110588</b> | <b>MST-127221</b> |
|----------------------------|-----------------|------------------|------------------|------------------|-------------------|-------------------|
| <b>Sequencing Platform</b> | Illumina        | Illumina         | Illumina         | Illumina         | PacBio            | Illumina          |
| <b>Total Contigs</b>       | 4               | 21               | 4                | 6                | 1                 | 5                 |
| <b>Mean Contig Length</b>  | 1,801,242       | 453,570          | 2,322,188        | 1,486,346        | 7,915,503         | 1,780,776         |
| <b>N50</b>                 | 9,114,431       | 1,425,667        | 9,288,751        | 6,331,616        | 7,915,503         | 8,773,046         |
| <b>Total Bases</b>         | 9,114,431       | 9,524,967        | 9,288,751        | 8,918,075        | 7,915,503         | 8,903,878         |

---



**2.2 Supplementary Table 2:** BLAST analysis of wollamide (*wo*) BGC from *Streptomyces* sp. MST-110588

| Name  | Start Position | End Position | Residues | Direction | Top Hit                                                                                            | Identity (%) | Coverage (%) | Role                    |
|-------|----------------|--------------|----------|-----------|----------------------------------------------------------------------------------------------------|--------------|--------------|-------------------------|
| Orf-1 | 4,622,717      | 4,623,274    | 345      | reverse   | -                                                                                                  | -            | -            | -                       |
| Orf-2 | 4,623,231      | 4,624,019    | 186      | forward   | ABC transporter [ <i>Streptomyces</i> sp. KCB13F003]                                               | 63           | 95           | Transport               |
| WoIP  | 4,624,440      | 4,624,853    | 263      | reverse   | thioesterase [ <i>Streptomyces</i> sp. 769]                                                        | 69           | 90           | Thioesterase            |
| WoIO  | 4,625,211      | 4,625,879    | 138      | forward   | hypothetical protein [ <i>Streptomyces</i> sp. L-9-10]                                             | 52           | 96           | Unknown                 |
| WoIN  | 4,625,867      | 4,627,078    | 223      | reverse   | LuxR family transcriptional regulator [ <i>Streptomyces</i> sp. KCB13F003]                         | 95           | 99           | Regulator               |
| WoIM  | 4,627,420      | 4,628,238    | 404      | reverse   | sensor histidine kinase [ <i>Streptomyces</i> sp. L-9-10]                                          | 82           | 99           | Regulator               |
| WoIL  | 4,628,235      | 4,631,006    | 273      | forward   | putative ABC transport system ATP-binding protein [ <i>Streptomyces yunnanensis</i> ]              | 79           | 99           | Transport               |
| WoIK  | 4,631,092      | 4,631,511    | 924      | forward   | ABC transporter permease [ <i>Streptomyces</i> sp. KCB13F003]                                      | 71           | 98           | Transport               |
| WoIX  | 4,631,762      | 4,633,141    | 140      | forward   | hypothetical protein [ <i>Streptomyces</i> sp. KCB13F003]                                          | 59           | 94           | Unknown                 |
| WoIJ  | 4,633,374      | 4,637,105    | 460      | forward   | DsaJ [ <i>Streptomyces scopuliridis</i> ]                                                          | 68           | 99           | Peptide Cyclase         |
| Woll  | 4,637,078      | 4,647,664    | 1244     | forward   | amino acid adenylation domain-containing protein [ <i>Streptomyces</i> sp. L-9-10]                 | 71           | 91           | NRPS                    |
| WoIH  | 4,647,843      | 4,655,768    | 3529     | forward   | NRPS [ <i>Streptomyces</i> sp. KCB13F003]                                                          | 67           | 99           | NRPS                    |
| WoIG2 | 4,655,877      | 4,656,086    | 2642     | forward   | DsaG [ <i>Streptomyces scopuliridis</i> ]                                                          | 66           | 99           | NRPS                    |
| WoIF2 | 4,656,171      | 4,656,551    | 70       | forward   | MbtH protein [ <i>Streptomyces</i> sp. KCB13F003]                                                  | 87           | 98           | NRPS                    |
| WoIE  | 4,656,623      | 4,664,527    | 127      | forward   | nuclear transport factor 2 family protein [ <i>Streptomyces</i> sp. L-9-10]                        | 79           | 99           | Amino acid biosynthesis |
| WoIG1 | 4,664,584      | 4,664,835    | 2635     | forward   | DsaG [ <i>Streptomyces scopuliridis</i> ]                                                          | 72           | 99           | NRPS                    |
| WoIF1 | 4,665,154      | 4,666,323    | 84       | forward   | MbtH protein [ <i>Streptomyces</i> sp. KCB13F003]                                                  | 61           | 76           | NRPS                    |
| WoID  | 4,666,320      | 4,666,823    | 390      | forward   | DsaD [ <i>Streptomyces scopuliridis</i> ]                                                          | 82           | 94           | Amino acid biosynthesis |
| WoIC  | 4,667,176      | 4,668,030    | 168      | forward   | YbaK/prolyl-tRNA synthetase associated domain-containing protein [ <i>Streptomyces</i> sp. L-9-10] | 84           | 98           | Unknown                 |
| WoIW  | 4,668,143      | 4,668,934    | 285      | forward   | amidinotransferase [ <i>Streptomyces</i> sp. KCB13F003]                                            | 91           | 93           | Amino acid biosynthesis |
| WoIB  | 4,669,242      | 4,670,300    | 264      | forward   | indole-3-glycerol phosphate synthase TrpC [ <i>Streptomyces</i> sp. NRRL S-1813]                   | 76           | 99           | Amino acid biosynthesis |
| WoIV  | 4,622,717      | 4,623,274    | 353      | reverse   | anthranilate phosphoribosyltransferase [ <i>Streptomyces decoyicus</i> ]                           | 83           | 99           | Amino acid biosynthesis |

| Name  | Start Position | End Position | Residues | Direction | Top Hit                                                                                      | Identity (%) | Coverage (%) | Role                    |
|-------|----------------|--------------|----------|-----------|----------------------------------------------------------------------------------------------|--------------|--------------|-------------------------|
| WoIU  | 4,670,408      | 4,671,829    | 474      | forward   | PLP-dependent aminotransferase family protein<br>[ <i>Streptomyces decoyicus</i> ]           | 82           | 99           | Amino acid biosynthesis |
| WoIT  | 4,671,909      | 4,672,484    | 192      | reverse   | aminodeoxychorismate/anthranilate synthase component II<br>[ <i>Streptomyces decoyicus</i> ] | 85           | 97           | Amino acid biosynthesis |
| WoIS  | 4,672,481      | 4,674,127    | 549      | reverse   | anthranilate synthase component I family protein<br>[ <i>Streptomyces</i> sp. NRRL S-1813]   | 69           | 99           | Amino acid biosynthesis |
| WoIR  | 4,674,491      | 4,675,834    | 448      | forward   | phospho-2-dehydro-3-deoxyheptonate aldolase<br>[ <i>Streptomyces</i> sp. KCB13F003]          | 85           | 97           | Amino acid biosynthesis |
| WoIA  | 4,676,859      | 4,677,629    | 257      | forward   | DsaA [ <i>Streptomyces scopuliridis</i> ]                                                    | 76           | 99           | Regulator               |
| Orf+1 | 4,678,250      | 4,678,567    | 106      | reverse   | DUF4190 domain-containing protein [ <i>Streptomyces varsoviensis</i> ]                       | 70           | 79           | -                       |
| Orf+2 | 4,678,564      | 4,678,728    | 55       | reverse   | hypothetical protein [ <i>Streptomyces albospinus</i> ]                                      | 74           | 98           | -                       |
| Orf+3 | 4,678,852      | 4,680,309    | 486      | reverse   | M6 family metalloprotease domain-containing protein<br>[ <i>Streptomyces</i> sp. ID38640]    | 65           | 79           | -                       |

Supplementary Table 2 continued.

**2.3 Supplementary Table 3:** BLAST analysis of desotamide (*dsa*) BGC from *Streptomyces* sp. MST-70754

| Name  | Start Position | End Position | Residues | Direction | Top Hit                                                                   | Identity (%) | Coverage (%) |
|-------|----------------|--------------|----------|-----------|---------------------------------------------------------------------------|--------------|--------------|
| Orf-6 | 1              | 984          | 328      | forward   | hypothetical protein [ <i>Streptomyces scopuliridis</i> ]                 | 89           | 99           |
| Orf-5 | 1113           | 3332         | 740      | reverse   | NADP-dependent isocitrate dehydrogenase [ <i>Streptomyces</i> sp. L-9-10] | 98           | 99           |
| Orf-4 | 3435           | 3821         | 129      | reverse   | D-ribose pyranase [ <i>Streptomyces scopuliridis</i> ]                    | 93           | 99           |
| Orf-3 | 3818           | 4798         | 327      | reverse   | ribokinase [ <i>Streptomyces scopuliridis</i> ]                           | 89           | 99           |
| Orf-2 | 4848           | 6824         | 659      | reverse   | inner-membrane translocator [ <i>Streptomyces scopuliridis</i> ]          | 99           | 99           |
| Orf-1 | 6814           | 8370         | 519      | reverse   | ATP-binding protein [ <i>Streptomyces scopuliridis</i> ]                  | 99           | 99           |
| DsaQ  | 8367           | 9506         | 380      | reverse   | DsaQ [ <i>Streptomyces scopuliridis</i> ]                                 | 98           | 99           |
| DsaX  | 9997           | 10614        | 206      | forward   | hypothetical protein [ <i>Streptomyces</i> sp. L-9-10]                    | 77           | 77           |
| DsaP  | 10517          | 11188        | 224      | reverse   | DsaP [ <i>Streptomyces scopuliridis</i> ]                                 | 97           | 99           |
| DsaO  | 11642          | 12091        | 150      | forward   | DsaO [ <i>Streptomyces scopuliridis</i> ]                                 | 98           | 99           |
| DsaN  | 12264          | 12932        | 223      | reverse   | response regulator transcription factor [ <i>Streptomyces</i> sp. L-9-10] | 98           | 99           |
| DsaM  | 12920          | 14131        | 404      | reverse   | DsaM [ <i>Streptomyces scopuliridis</i> ]                                 | 98           | 99           |
| DsaL  | 14411          | 15229        | 273      | forward   | ABC transporter ATP-binding protein [ <i>Streptomyces</i> sp. L-9-10]     | 93           | 99           |
| DsaK  | 15235          | 17994        | 920      | forward   | DsaK [ <i>Streptomyces scopuliridis</i> ]                                 | 99           | 99           |
| DsaJ  | 18164          | 19573        | 470      | forward   | DsaJ [ <i>Streptomyces scopuliridis</i> ]                                 | 99           | 99           |
| DsaH  | 19805          | 34177        | 4791     | forward   | NRPS [ <i>Streptomyces</i> sp. KCB13F003]                                 | 65           | 99           |
| DsaG  | 34298          | 42241        | 2648     | forward   | DsaG [ <i>Streptomyces scopuliridis</i> ]                                 | 97           | 99           |
| DsaF  | 42320          | 42529        | 70       | forward   | DsaF [ <i>Streptomyces scopuliridis</i> ]                                 | 100          | 98           |
| DsaE  | 42618          | 42992        | 125      | forward   | DsaE [ <i>Streptomyces scopuliridis</i> ]                                 | 98           | 99           |
| DsaD  | 43122          | 44255        | 378      | forward   | DsaD [ <i>Streptomyces scopuliridis</i> ]                                 | 98           | 99           |
| DsaC  | 44252          | 44755        | 168      | forward   | DsaC [ <i>Streptomyces scopuliridis</i> ]                                 | 99           | 99           |
| DsaB  | 44826          | 45638        | 271      | forward   | DsaB [ <i>Streptomyces scopuliridis</i> ]                                 | 98           | 99           |
| DsaY  | 46439          | 46624        | 62       | forward   | -                                                                         | -            | -            |
| DsaA  | 46599          | 47516        | 306      | forward   | DsaA [ <i>Streptomyces scopuliridis</i> ]                                 | 99           | 99           |
| Orf+1 | 47650          | 48351        | 234      | reverse   | hydrolase [ <i>Streptomyces scopuliridis</i> ]                            | 98           | 99           |
| Orf+2 | 48365          | 48847        | 161      | reverse   | transcriptional regulator [ <i>Streptomyces scopuliridis</i> ]            | 100          | 99           |
| Orf+3 | 48905          | 50305        | 467      | reverse   | hypothetical protein [ <i>Streptomyces scopuliridis</i> ]                 | 89           | 99           |

**2.4 Supplementary Table 4:** BLAST analysis of desotamide (*dsa*) BGC from *Streptomyces* sp. MST-71321

| Name  | Start Position | End Position | Residues | Direction | Top Hit                                                                   | Identity (%) | Coverage (%) |
|-------|----------------|--------------|----------|-----------|---------------------------------------------------------------------------|--------------|--------------|
| Orf-1 | 1              | 618          | 206      | forward   | hypothetical protein [ <i>Streptomyces</i> sp. L-9-10]                    | 77           | 77           |
| DsaP  | 521            | 1192         | 224      | reverse   | DsaP [ <i>Streptomyces scopuliridis</i> ]                                 | 97           | 99           |
| DsaO  | 1655           | 2104         | 150      | forward   | DsaO [ <i>Streptomyces scopuliridis</i> ]                                 | 97           | 99           |
| DsaN  | 2277           | 2945         | 223      | reverse   | response regulator transcription factor [ <i>Streptomyces</i> sp. L-9-10] | 98           | 99           |
| DsaM  | 2933           | 4144         | 404      | reverse   | DsaM [ <i>Streptomyces scopuliridis</i> ]                                 | 99           | 99           |
| DsaL  | 4424           | 5242         | 273      | forward   | ABC transporter ATP-binding protein [ <i>Streptomyces</i> sp. L-9-10]     | 93           | 99           |
| DsaK  | 5248           | 8007         | 920      | forward   | DsaK [ <i>Streptomyces scopuliridis</i> ]                                 | 99           | 99           |
| DsaJ  | 8177           | 9586         | 470      | forward   | DsaJ [ <i>Streptomyces scopuliridis</i> ]                                 | 99           | 99           |
| DsaH  | 9818           | 24172        | 4785     | forward   | NRPS [ <i>Streptomyces</i> sp. KCB13F003]                                 | 65           | 99           |
| DsaG  | 24296          | 32239        | 2648     | forward   | DsaG [ <i>Streptomyces scopuliridis</i> ]                                 | 97           | 99           |
| DsaF  | 32324          | 32533        | 70       | forward   | DsaF [ <i>Streptomyces scopuliridis</i> ]                                 | 100          | 98           |
| DsaE  | 32603          | 32977        | 125      | forward   | DsaE [ <i>Streptomyces scopuliridis</i> ]                                 | 98           | 99           |
| DsaD  | 33110          | 34243        | 378      | forward   | DsaD [ <i>Streptomyces scopuliridis</i> ]                                 | 98           | 99           |
| DsaC  | 34240          | 34743        | 168      | forward   | DsaC [ <i>Streptomyces scopuliridis</i> ]                                 | 99           | 99           |
| DsaB  | 34813          | 35625        | 271      | forward   | DsaB [ <i>Streptomyces scopuliridis</i> ]                                 | 97           | 99           |
| DsaY  | 36438          | 36623        | 62       | forward   | -                                                                         | -            | -            |
| DsaA  | 36598          | 37515        | 306      | forward   | DsaA [ <i>Streptomyces scopuliridis</i> ]                                 | 99           | 99           |
| Orf+1 | 37641          | 38342        | 234      | reverse   | hydrolase [ <i>Streptomyces scopuliridis</i> ]                            | 98           | 99           |
| Orf+2 | 38356          | 38838        | 161      | reverse   | transcriptional regulator [ <i>Streptomyces scopuliridis</i> ]            | 100          | 99           |
| Orf+3 | 38896          | 40293        | 466      | reverse   | hypothetical protein [ <i>Streptomyces scopuliridis</i> ]                 | 90           | 99           |

**2.5 Supplementary Table 5:** BLAST analysis of desotamide (*dsa*) BGC from *Streptomyces* sp. MST-71458

| Name  | Start Position | End Position | Residues | Direction | Top Hit                                                                                | Identity (%) | Coverage (%) |
|-------|----------------|--------------|----------|-----------|----------------------------------------------------------------------------------------|--------------|--------------|
| Orf-1 | 1              | 639          | 213      | forward   | hypothetical protein [ <i>Streptomyces</i> sp. L-9-10]                                 | 77           | 78           |
| DsaP  | 521            | 1213         | 231      | reverse   | DsaP [ <i>Streptomyces scopuliridis</i> ]                                              | 92           | 100          |
| DsaO  | 1667           | 2116         | 150      | forward   | DsaO [ <i>Streptomyces scopuliridis</i> ]                                              | 97           | 100          |
| DsaN  | 2290           | 2958         | 223      | reverse   | response regulator transcription factor [ <i>Streptomyces</i> sp. L-9-10]              | 98           | 100          |
| DsaM  | 2946           | 4157         | 404      | reverse   | DsaM [ <i>Streptomyces scopuliridis</i> ]                                              | 98           | 100          |
| DsaL  | 4437           | 5255         | 273      | forward   | ABC transporter ATP-binding protein [ <i>Streptomyces</i> sp. L-9-10]                  | 92           | 99           |
| DsaK  | 5261           | 8020         | 920      | forward   | DsaK [ <i>Streptomyces scopuliridis</i> ]                                              | 98           | 100          |
| DsaJ  | 8190           | 9599         | 470      | forward   | DsaJ [ <i>Streptomyces scopuliridis</i> ]                                              | 99           | 100          |
| DsaH  | 9830           | 24238        | 4803     | forward   | NRPS [ <i>Streptomyces</i> sp. KCB13F003]                                              | 65           | 100          |
| DsaG  | 24343          | 32280        | 2646     | forward   | DsaG [ <i>Streptomyces scopuliridis</i> ]                                              | 97           | 100          |
| DsaF  | 32347          | 32556        | 70       | forward   | DsaF [ <i>Streptomyces scopuliridis</i> ]                                              | 100          | 100          |
| DsaE  | 32662          | 33036        | 125      | forward   | DsaE [ <i>Streptomyces scopuliridis</i> ]                                              | 99           | 100          |
| DsaD  | 33125          | 34258        | 378      | forward   | DsaD [ <i>Streptomyces scopuliridis</i> ]                                              | 97           | 100          |
| DsaC  | 34255          | 34758        | 168      | forward   | DsaC [ <i>Streptomyces scopuliridis</i> ]                                              | 99           | 100          |
| DsaB  | 34828          | 35640        | 271      | forward   | DsaB [ <i>Streptomyces scopuliridis</i> ]                                              | 99           | 100          |
| DsaA  | 36620          | 37537        | 306      | forward   | DsaA [ <i>Streptomyces scopuliridis</i> ]                                              | 100          | 100          |
| Orf+1 | 37646          | 38347        | 234      | reverse   | hydrolase [ <i>Streptomyces scopuliridis</i> ]                                         | 98           | 100          |
| Orf+2 | 38361          | 38843        | 161      | reverse   | winged helix-turn-helix domain-containing protein [ <i>Streptomyces scopuliridis</i> ] | 90           | 100          |
| Orf+3 | 38901          | 40286        | 462      | reverse   | FUSC family protein [ <i>Streptomyces scopuliridis</i> ]                               | 92           | 98           |

**2.6 Supplementary Table 6:** BLAST analysis of desotamide (*dsa*) BGC from *Streptomyces* sp. MST-94754

| Name  | Start Position | End Position | Residues | Direction | Top Hit                                                                            | Identity (%) | Coverage (%) |
|-------|----------------|--------------|----------|-----------|------------------------------------------------------------------------------------|--------------|--------------|
| Orf-1 | 1              | 639          | 213      | forward   | hypothetical protein [ <i>Streptomyces</i> sp. L-9-10]                             | 92           | 77           |
| DsaP  | 521            | 1219         | 233      | reverse   | thioesterase [ <i>Streptomyces</i> sp. L-9-10]                                     | 91           | 99           |
| DsaO  | 1673           | 2122         | 150      | forward   | hypothetical protein [ <i>Streptomyces</i> sp. L-9-10]                             | 95           | 99           |
| DsaN  | 2340           | 3008         | 223      | reverse   | response regulator transcription factor [ <i>Streptomyces</i> sp. L-9-10]          | 100          | 99           |
| DsaM  | 2996           | 4207         | 404      | reverse   | DsaM [ <i>Streptomyces scopuliridis</i> ]                                          | 98           | 99           |
| DsaL  | 4494           | 5312         | 273      | forward   | ABC transporter ATP-binding protein [ <i>Streptomyces</i> sp. L-9-10]              | 99           | 99           |
| DsaK  | 5318           | 8086         | 923      | forward   | ABC transporter permease [ <i>Streptomyces</i> sp. L-9-10]                         | 96           | 99           |
| DsaJ  | 8405           | 9814         | 470      | forward   | serine hydrolase [ <i>Streptomyces</i> sp. L-9-10]                                 | 96           | 99           |
| DsaI  | 10049          | 14797        | 1583     | forward   | amino acid adenylation domain-containing protein [ <i>Streptomyces</i> sp. L-9-10] | 90           | 84           |
| DsaH  | 14854          | 24138        | 3095     | forward   | DsaH [ <i>Streptomyces scopuliridis</i> ]                                          | 89           | 99           |
| DsaG  | 24246          | 32198        | 2651     | forward   | DsaG [ <i>Streptomyces scopuliridis</i> ]                                          | 89           | 99           |
| DsaF  | 32238          | 32447        | 70       | forward   | MbtH family protein [ <i>Streptomyces</i> sp. L-9-10]                              | 96           | 98           |
| DsaE  | 32544          | 32918        | 125      | forward   | nuclear transport factor 2 family protein [ <i>Streptomyces</i> sp. L-9-10]        | 97           | 99           |
| DsaD  | 32976          | 34133        | 386      | forward   | branched-chain amino acid aminotransferase [ <i>Streptomyces</i> sp. L-9-10]       | 93           | 99           |
| DsaC  | 34130          | 34633        | 168      | forward   | DsaC [ <i>Streptomyces scopuliridis</i> ]                                          | 94           | 99           |
| DsaB  | 34705          | 35520        | 272      | forward   | indole-3-glycerol phosphate synthase TrpC [ <i>Streptomyces</i> sp. L-9-10]        | 93           | 92           |
| DsaR  | 35577          | 36182        | 202      | reverse   | TetR family transcriptional regulator [ <i>Streptomyces</i> sp. NEAU-C40]          | 85           | 94           |
| DsaS  | 36314          | 37213        | 300      | forward   | SDR family oxidoreductase [ <i>Streptomyces</i> sp. NEAU-C40]                      | 88           | 99           |
| DsaA  | 38559          | 39476        | 306      | forward   | DsaA [ <i>Streptomyces scopuliridis</i> ]                                          | 93           | 99           |
| Orf+1 | 39669          | 40370        | 234      | reverse   | HAD family phosphatase [ <i>Streptomyces</i> sp. L-9-10]                           | 97           | 99           |
| Orf+2 | 40384          | 40866        | 161      | reverse   | Lrp/AsnC family transcriptional regulator [ <i>Streptomyces</i> sp. L-9-10]        | 99           | 99           |
| Orf+3 | 40938          | 42365        | 476      | reverse   | hypothetical protein [ <i>Streptomyces</i> sp. L-9-10]                             | 84           | 99           |

**2.7 Supplementary Table 7:** BLAST analysis of desotamide (*dsa*) BGC from *Streptomyces* sp. MST-127221

| Name  | Start Position | End Position | Residues | Direction | Top Hit                                                                                            | Identity (%) | Coverage (%) |
|-------|----------------|--------------|----------|-----------|----------------------------------------------------------------------------------------------------|--------------|--------------|
| Orf-1 | 1              | 633          | 211      | forward   | hypothetical protein [ <i>Streptomyces</i> sp. L-9-10]                                             | 77           | 93           |
| DsaP  | 521            | 1213         | 231      | reverse   | thioesterase [ <i>Streptomyces</i> sp. L-9-10]                                                     | 94           | 99           |
| DsaO  | 1666           | 2115         | 150      | forward   | hypothetical protein [ <i>Streptomyces</i> sp. L-9-10]                                             | 96           | 99           |
| DsaN  | 2305           | 2973         | 223      | reverse   | response regulator transcription factor [ <i>Streptomyces</i> sp. L-9-10]                          | 100          | 99           |
| DsaM  | 2961           | 4172         | 404      | reverse   | sensor histidine kinase [ <i>Streptomyces</i> sp. L-9-10]                                          | 98           | 99           |
| DsaL  | 4459           | 5277         | 273      | forward   | ABC transporter ATP-binding protein [ <i>Streptomyces</i> sp. L-9-10]                              | 100          | 99           |
| DsaK  | 5283           | 8051         | 923      | forward   | ABC transporter permease [ <i>Streptomyces</i> sp. L-9-10]                                         | 98           | 99           |
| DsaJ  | 8370           | 9779         | 470      | forward   | serine hydrolase [ <i>Streptomyces</i> sp. L-9-10]                                                 | 97           | 99           |
| DsaH  | 9924           | 24395        | 4824     | forward   | NRPS [ <i>Streptomyces</i> sp. KCB13F003]                                                          | 66           | 99           |
| DsaG  | 24509          | 32494        | 2662     | forward   | DsaG [ <i>Streptomyces scopuliridis</i> ]                                                          | 89           | 99           |
| DsaF  | 32532          | 32741        | 70       | forward   | MbtH family protein [ <i>Streptomyces</i> sp. L-9-10]                                              | 100          | 98           |
| DsaE  | 32802          | 33176        | 125      | forward   | nuclear transport factor 2 family protein [ <i>Streptomyces</i> sp. L-9-10]                        | 100          | 99           |
| DsaD  | 33234          | 34400        | 389      | forward   | branched-chain amino acid aminotransferase [ <i>Streptomyces</i> sp. L-9-10]                       | 94           | 99           |
| DsaC  | 34397          | 34900        | 168      | forward   | YbaK/prolyl-tRNA synthetase associated domain-containing protein [ <i>Streptomyces</i> sp. L-9-10] | 97           | 99           |
| DsaB  | 34987          | 35793        | 269      | forward   | indole-3-glycerol phosphate synthase TrpC [ <i>Streptomyces</i> sp. L-9-10]                        | 97           | 99           |
| DsaT  | 35821          | 36393        | 191      | reverse   | TetR family transcriptional regulator [ <i>Streptomyces</i> sp. NEAU-C40]                          | 82           | 99           |
| DsaS  | 36516          | 37412        | 299      | forward   | SDR family oxidoreductase [ <i>Streptomyces</i> sp. NEAU-C40]                                      | 88           | 99           |
| DsaY  | 37630          | 38028        | 133      | reverse   | -                                                                                                  | -            | -            |
| DsaA  | 38751          | 39668        | 306      | forward   | DsaA [ <i>Streptomyces scopuliridis</i> ]                                                          | 94           | 99           |
| Orf+1 | 39709          | 40410        | 234      | reverse   | HAD family phosphatase [ <i>Streptomyces</i> sp. L-9-10]                                           | 97           | 99           |
| Orf+2 | 40424          | 40906        | 161      | reverse   | Lrp/AsnC family transcriptional regulator [ <i>Streptomyces</i> sp. L-9-10]                        | 99           | 99           |
| Orf+3 | 40964          | 42394        | 477      | reverse   | hypothetical protein [ <i>Streptomyces</i> sp. L-9-10]                                             | 90           | 99           |

**2.8 Supplementary Table 8:** Adenylation Domain Specificity Codes of the Wollamide (*woI*) BGC and RmoG (Orf6595)

| <b>A Domain</b> | <b>235</b> | <b>236</b> | <b>239</b> | <b>278</b> | <b>299</b> | <b>301</b> | <b>322</b> | <b>330</b> | <b>331</b> | <b>517</b> | <b>Observed Substrate</b> |
|-----------------|------------|------------|------------|------------|------------|------------|------------|------------|------------|------------|---------------------------|
| 1AMU            | D          | A          | W          | T          | I          | A          | A          | I          | C          | K          | L-phenylalanine           |
| WolI A          | D          | V          | A          | M          | T          | G          | M          | V          | T          | K          | L-tryptophan              |
| WolH A1         | D          | A          | L          | F          | V          | A          | A          | V          | A          | K          | L-isoleucine              |
| WolH A2         | D          | A          | L          | F          | V          | A          | A          | V          | V          | K          | L-leucine                 |
| WolH A3         | D          | A          | L          | W          | S          | G          | G          | V          | F          | K          | L-leucine                 |
| WolG2 A1        | D          | L          | T          | K          | G          | E          | E          | V          | G          | K          | L-asparagine              |
| WolG2 A2        | S          | F          | S          | D          | L          | G          | F          | V          | D          | K          | L-ornithine               |
| WolG1 A1        | D          | L          | T          | K          | G          | E          | E          | V          | G          | K          | L-asparagine              |
| WolG1 A2        | D          | I          | L          | Q          | G          | E          | L          | I          | W          | K          | glycine                   |
| RmoG A          | D          | I          | L          | Q          | L          | G          | V          | I          | W          | K          | glycine                   |

Substrate specificity codes of each adenylation domain were identified by alignment with PheA from *Bacillus brevis* (1AMU).



**2.9 Supplementary Table 9:** RDP analysis of all NRPS encoded adenylation domains in the *Streptomyces* sp. MST-110588 genome

| Recombinant           | Major parent     | Minor parent    | Recombinant region | R | G | B | M | C | S | T |
|-----------------------|------------------|-----------------|--------------------|---|---|---|---|---|---|---|
| <b><u>wolG1A2</u></b> | <b>wolG2A2</b>   | <b>orf6595A</b> | <b>Y116-G343</b>   | + | + | + | + | + | + | + |
| <i>orf1237A</i>       | Unknown          | <i>orf1236A</i> | I352-I448          | + | + | + | + | + | + | + |
| <i>orf6593A2</i>      | <i>orf1236A</i>  | Unknown         | M139-N354          | + | - | + | - | + | + | - |
| <i>orf1237A</i>       | <i>orf6652A</i>  | Unknown         | K223-M241          | + | + | - | + | - | - | - |
| <i>orf3282A</i>       | <i>orf6595A</i>  | Unknown         | I357-H452          | - | - | + | + | - | + | - |
| <i>wolHA1</i>         | <i>wolHA3</i>    | <i>orf1227A</i> | N219-K316          | - | - | - | + | + | + | - |
| <i>wolHA2</i>         | <i>wolHA3</i>    | <i>orf1227A</i> | N219-K316          | - | - | - | + | + | + | - |
| <i>wolG1A1</i>        | <i>wolHA3</i>    | <i>orf1227A</i> | N219-K316          | - | - | - | + | + | + | - |
| <i>wolG2A1</i>        | <i>wolHA3</i>    | <i>orf1227A</i> | N219-K316          | - | - | - | + | + | + | - |
| <i>orf6593A1</i>      | <i>orf6652A</i>  | Unknown         | K314-R389          | + | - | - | - | - | + | - |
| <i>orf252A</i>        | <i>orf253A</i>   | <i>orf6595A</i> | T173-L202          | - | - | - | + | + | - | - |
| <i>orf363A</i>        | <i>wolG2A2</i>   | <i>orf6625</i>  | L91-L450           | - | - | - | + | + | - | - |
| <i>orf1224A</i>       | <i>orf6593A1</i> | <i>orf289A</i>  | K84-A332           | - | - | - | + | + | - | - |
| <i>orf1236A</i>       | Unknown          | <i>orf6594</i>  | M95-I377           | - | - | - | + | - | + | - |

Predicted recombinants from RDP4 for which breakpoint analysis could be applied. Recombination region refers to the approximate homologous positions in the L-phenylalanine activating domain of gramicidin synthase (1AMU). Events are sorted by the whether or not (+/-) the event was predicted by a given detection method (R: RDP<sup>14</sup>; G: GENECONV<sup>15</sup>; B: BootScan<sup>16</sup>; M: MaxChi<sup>17</sup>; C: Chimaera<sup>18</sup>; S: SiScan<sup>19</sup>; L: LARD<sup>20</sup>).

**2.10 Supplementary Table 10:** cblaster analysis of minor parent BGC from *Streptomyces* sp. MST-110588

| Organism                                              | MIBIG Accession | Product    | 6603 | 02 | 01 | 00 | 99 | <u>E</u> | F | 96 | <u>G</u> | H | I | 92 | J | K | L | M | 87 | 86 | 6585 |
|-------------------------------------------------------|-----------------|------------|------|----|----|----|----|----------|---|----|----------|---|---|----|---|---|---|---|----|----|------|
| <i>Streptomyces rimosus</i> subsp. rimosus ATCC 10970 | BGC0001760      | Rimosamide | 0    | 0  | 0  | 0  | 0  | 1        | 1 | 0  | 1        | 1 | 1 | 1  | 1 | 1 | 1 | 1 | 0  | 0  | 0    |
| <i>Streptomyces canus</i> ATCC 12647                  | BGC0001406      | Telomycin  | 1    | 1  | 0  | 0  | 0  | 0        | 0 | 0  | 1        | 0 | 1 | 0  | 0 | 0 | 0 | 0 | 0  | 0  | 0    |
| <i>Streptomyces</i> sp. SANK 62799 SANK 62799         | BGC0000288      | A-503083   | 0    | 0  | 0  | 0  | 0  | 0        | 0 | 0  | 0        | 0 | 0 | 0  | 0 | 0 | 0 | 0 | 1  | 1  | 1    |

Results from a local cblaster<sup>21,22</sup> search querying the genes surrounding *orf6595* against a local copy of the MIBiG<sup>22</sup> database (16/10/19). Genes are named according to their *rmo* homologue or position in the *Streptomyces* sp MST115088 genome where no homologue is available. The minor parent involved in the recombination event discussed in this paper, *rmoG* (*orf6595*), is underlined. Cells are shaded to reflect the number of hits against each cluster.

**2.11 Supplementary Table 11:** Hydroxylamine trapping assay of adenylation domain specificity

| Amino Acid | WolG2A2 |        | WolG1A2 |        | RmoG |        | Recombinant |        |
|------------|---------|--------|---------|--------|------|--------|-------------|--------|
|            | A545    | SE     | A545    | SE     | A545 | SE     | A545        | SE     |
| A          | 0.00    | 3.E-04 | 0.00    | 8.E-04 | 0.00 | 6.E-04 | 0.01        | 7.E-04 |
| C          | 0.00    | 3.E-03 | 0.00    | 1.E-03 | 0.00 | 3.E-04 | 0.01        | 6.E-04 |
| D          | 0.01    | 1.E-03 | 0.00    | 2.E-03 | 0.00 | 6.E-04 | 0.01        | 7.E-04 |
| E          | 0.00    | 3.E-04 | 0.00    | 6.E-04 | 0.00 | 6.E-04 | 0.01        | 1.E-03 |
| F          | 0.00    | 7.E-04 | 0.00    | 4.E-04 | 0.00 | 2.E-03 | 0.01        | 7.E-04 |
| G          | 0.00    | 6.E-04 | 0.02    | 7.E-03 | 0.03 | 7.E-03 | 0.07        | 3.E-03 |
| H          | 0.00    | 1.E-03 | 0.00    | 1.E-03 | 0.00 | 1.E-03 | 0.01        | 3.E-04 |
| I          | 0.00    | 7.E-04 | 0.00    | 5.E-04 | 0.00 | 9.E-04 | 0.01        | 3.E-04 |
| K          | 0.00    | 3.E-04 | 0.00    | 1.E-04 | 0.00 | 1.E-03 | 0.01        | 3.E-04 |
| L          | 0.00    | 6.E-04 | 0.00    | 6.E-04 | 0.00 | 3.E-04 | 0.01        | 9.E-04 |
| M          | 0.00    | 3.E-04 | 0.00    | 3.E-04 | 0.00 | 3.E-04 | 0.01        | 3.E-04 |
| N          | 0.01    | 6.E-04 | 0.00    | 2.E-03 | 0.00 | 3.E-03 | 0.01        | 6.E-04 |
| O          | 0.02    | 2.E-03 | 0.00    | 4.E-03 | 0.00 | 7.E-04 | 0.01        | 9.E-04 |
| P          | 0.00    | 3.E-04 | 0.00    | 1.E-04 | 0.00 | 1.E-03 | 0.01        | 0.E00  |
| Q          | 0.00    | 1.E-03 | 0.00    | 1.E-03 | 0.00 | 2.E-03 | 0.01        | 3.E-04 |
| R          | 0.00    | 1.E-03 | 0.00    | 5.E-04 | 0.00 | 1.E-03 | 0.01        | 6.E-04 |
| S          | 0.00    | 9.E-04 | 0.00    | 1.E-03 | 0.00 | 3.E-04 | 0.01        | 9.E-04 |
| T          | 0.00    | 3.E-04 | 0.00    | 1.E-04 | 0.00 | 6.E-04 | 0.01        | 7.E-04 |
| V          | 0.00    | 2.E-03 | 0.00    | 7.E-04 | 0.00 | 9.E-04 | 0.01        | 2.E-03 |
| W          | 0.00    | 9.E-04 | 0.00    | 2.E-04 | 0.00 | 7.E-04 | 0.01        | 1.E-03 |
| Y          | 0.00    | 9.E-04 | 0.00    | 6.E-04 | 0.00 | 9.E-04 | 0.01        | 6.E-04 |

Each domain was tested against the twenty proteinogenic amino acids and L-ornithine (O). Average absorbance at 545 nm measured during the assay across at least three replicates per sample and standard errors are displayed. Absorption values are shaded according to intensity. The full dataset is available as a linked Source Data file.

## 2.12 Supplementary Table 12: Strains used in this study

| Strain                                                                                    | Description                                                                                                                                                                                                                                                                | Reference     |
|-------------------------------------------------------------------------------------------|----------------------------------------------------------------------------------------------------------------------------------------------------------------------------------------------------------------------------------------------------------------------------|---------------|
| <i>Escherichia coli</i> ET12567/pUZ8002                                                   | Demethylating conjugative strain containing the helper plasmid pUZ8002.                                                                                                                                                                                                    | <sup>23</sup> |
| <i>Escherichia coli</i> ET12567/pUZ8002 pBO1                                              | Conjugation of the plasmid pBO1 to <i>Streptomyces</i> strains.                                                                                                                                                                                                            | This study    |
| <i>Escherichia coli</i> ET12567/pUZ8002 pBO1- <i>wolG2</i>                                | Conjugation of the plasmid pBO1- <i>wolG2</i> to <i>Streptomyces</i> .                                                                                                                                                                                                     | This study    |
| <i>Escherichia coli</i> NiCo21 (DE3)                                                      | Protein expression strain.                                                                                                                                                                                                                                                 |               |
| <i>Escherichia coli</i> NiCo21 (DE3)/pET28a(+)- <i>orf6595</i>                            | Expression of the adenylation domain ORF6595.                                                                                                                                                                                                                              | This study    |
| <i>Escherichia coli</i> NiCo21 (DE3)/pET28a(+)- <i>orf6595</i> ; pCDFDuet-1- <i>wolF2</i> | Coexpression of the adenylation domain ORF6595 and the MbtH-like protein WolF2.                                                                                                                                                                                            | This study    |
| <i>Escherichia coli</i> NiCo21 (DE3)/pET28a(+)- <i>wolG1A2</i>                            | Expression of the adenylation domain WolG1A2.                                                                                                                                                                                                                              | This study    |
| <i>Escherichia coli</i> NiCo21 (DE3)/pET28a(+)- <i>wolG1A2</i> ; pCDFDuet-1- <i>wolF2</i> | Coexpression of the adenylation domain WolG1A2 and the MbtH-like protein WolF2.                                                                                                                                                                                            | This study    |
| <i>Escherichia coli</i> NiCo21 (DE3)/pET28a(+)- <i>wolG2A2</i>                            | Expression of the adenylation domain WolG2A2.                                                                                                                                                                                                                              | This study    |
| <i>Escherichia coli</i> NiCo21 (DE3)/pET28a(+)- <i>wolG2A2</i> ; pCDFDuet-1- <i>wolF2</i> | Coexpression of the adenylation domain WolG2A2 and the MbtH-like protein WolF2.                                                                                                                                                                                            | This study    |
| <i>Escherichia coli</i> NiCo21 (DE3)/pET28a(+)- <i>wolG2MP</i>                            | Expression of the adenylation domain WolG2A2::RmoG.                                                                                                                                                                                                                        | This study    |
| <i>Escherichia coli</i> NiCo21 (DE3)/pET28a(+)- <i>wolG2MP</i> ; pCDFDuet-1- <i>wolF2</i> | Coexpression of the hybrid adenylation domain WolG2A2::RmoG and the MbtH-like protein WolF2.                                                                                                                                                                               | This study    |
| <i>Escherichia coli</i> DH5 $\alpha$                                                      | Cloning and propagation of vectors.                                                                                                                                                                                                                                        | <sup>24</sup> |
| <i>Escherichia coli</i> DH10B                                                             | F <sub>+</sub> <i>mcrA</i> ( <i>mrr</i> - <i>hsdRMS</i> - <i>mcrBC</i> ), 80 <i>lacZ</i> $\Delta$ , M15, $\Delta$ <i>lacX74</i> <i>recA1</i> <i>endA1</i> <i>araD</i> 139 $\Delta$ ( <i>ara</i> , <i>leu</i> )7697 <i>galU</i> <i>galK</i> <i>lrpsL</i> (Strr) <i>nupG</i> | <sup>24</sup> |
| <i>Saccharomyces cerevisiae</i> CEN.PK 2-1C                                               | Assembly and propagation of pBO1 and its derivatives.                                                                                                                                                                                                                      | <sup>25</sup> |
| <i>Streptomyces</i> sp. MST-110588                                                        | Desotamide and wollamide producing strain.                                                                                                                                                                                                                                 | This study    |
| <i>Streptomyces</i> sp. MST-127221                                                        | Desotamide producing strain.                                                                                                                                                                                                                                               | This study    |
| <i>Streptomyces</i> sp. MST-70754                                                         | Desotamide producing strain.                                                                                                                                                                                                                                               | This study    |
| <i>Streptomyces</i> sp. MST-70754/pBO1                                                    | Desotamide producing strain containing empty pBO1 (control).                                                                                                                                                                                                               | This study    |
| <i>Streptomyces</i> sp. MST-70754/pBO1- <i>wolG2</i>                                      | Desotamide producing strain engineered to produce wollamides through over expression of <i>wolG2</i>                                                                                                                                                                       | This study    |
| <i>Streptomyces</i> sp. MST-71321                                                         | Desotamide producing strain.                                                                                                                                                                                                                                               | This study    |
| <i>Streptomyces</i> sp. MST-71458                                                         | Desotamide producing strain.                                                                                                                                                                                                                                               | This study    |
| <i>Streptomyces</i> sp. MST-94754                                                         | Desotamide producing strain.                                                                                                                                                                                                                                               | This study    |

**2.13 Supplementary Table 13: Plasmids used in this study**

| <b>Plasmid</b>         | <b>Description</b>                                                                                                                                                                                                   | <b>Reference</b>        |
|------------------------|----------------------------------------------------------------------------------------------------------------------------------------------------------------------------------------------------------------------|-------------------------|
| pGP9                   | Integrative ( $\phi$ BT1) <i>Streptomyces</i> expression vector; propagates in <i>E. coli</i> for cloning/conjugation; Apr <sup>R</sup>                                                                              | 5                       |
| pFF62A                 | Yeast shuttle vector used in the construction of pBO1                                                                                                                                                                | 6                       |
| pUZ8002                | Non-transmissible oriT mobilizing plasmid; Cm <sup>R</sup>                                                                                                                                                           | 23                      |
| pBO1                   | Integrative ( $\phi$ BT1) <i>Streptomyces</i> expression vector; propagates in <i>E. coli</i> and <i>S. cerevisiae</i> for cloning and conjugation; Apr <sup>R</sup>                                                 | This study.             |
| pBO1- <i>wolG2</i>     | Integrative ( $\phi$ BT1) <i>Streptomyces</i> expression vector with <i>wolG2</i> cloned between the NdeI sites; propagates in <i>E. coli</i> and <i>S. cerevisiae</i> for cloning and conjugation; Apr <sup>R</sup> | This study.             |
| pET28a                 | <i>E. coli</i> expression vector; Kan <sup>R</sup>                                                                                                                                                                   | EMD Biosciences         |
| pET28a- <i>wolG1A1</i> | <i>E. coli</i> expression vector with adenylation domain coding region ( <i>WolG2A1</i> ) cloned between NdeI and XhoI sites; Kan <sup>R</sup>                                                                       | This study.             |
| pET28a- <i>wolG2A2</i> | <i>E. coli</i> expression vector with adenylation domain coding region ( <i>WolG2A2</i> ) cloned between NdeI and XhoI sites; Kan <sup>R</sup>                                                                       | This study.             |
| pET28a- <i>wolG2MP</i> | <i>E. coli</i> expression vector with hybrid adenylation domain coding region ( <i>WolG2A2::RmoG</i> ). This vector is a derivative of pET28a- <i>wolG2A2</i> .                                                      | This study              |
| pCDFDuet               | <i>E. coli</i> expression vector; Sm <sup>R</sup>                                                                                                                                                                    | Novagen (EMD Millipore) |
| pcDFDuet- <i>wolF2</i> | <i>E. coli</i> expression vector with <i>wolF</i> cloned between NdeI and KpnI sites; Sm <sup>R</sup>                                                                                                                | This study.             |

**2.14 Supplementary Table 14:** Primers used in this study

| Primer        | Sequence                                                                                                                                                                  | Annealing Temperature (°C) | Description                                            |
|---------------|---------------------------------------------------------------------------------------------------------------------------------------------------------------------------|----------------------------|--------------------------------------------------------|
| pGP9_seq_F1   | gagcggcggtcgaagggagatg                                                                                                                                                    | 50                         | Sequencing and colony PCR of pBO1 inserts              |
| pGP9_seq_R1   | cgagcgttctgaacaaatccag                                                                                                                                                    |                            |                                                        |
| pBO1_pGP9_F1  | aatttattcatatcaggattatcaataccatattttgaaaaagccggttctgtaa                                                                                                                   | 70                         | Amplification of pGP9 for the assembly of pBO1         |
| pBO1_pGP9_R1  | tgaaggagaaaactcaccgaggcacttctcgcactgactcg<br>agcagcaccatgatgacggttttcatcggatcttaaacagtgcgctctga<br>tagctcagataatgattatccggcagcagaaccggaccatcaccaacgcgt<br>tggccgattcattaa |                            |                                                        |
| pBO1_pFF_F1   | agaacgctcggttgccgcccggcggtttttattggtgagaatccaagctaga                                                                                                                      | 70                         | Amplification of pFF for the assembly of pBO1          |
| pBO1_pFF_R1   | aatctgcattaatgaatcgccaacgcgttggtgatggccggttctg<br>ccgtattaccgcctttgagtgagctgataccgctcggcagccgaacgac<br>cgagcgcagcagtcagtgagcaggaagtgcctcggtagttttctcc                     |                            |                                                        |
| pBO1_wolG2_F1 | tfcgagcctcctcgcagccacggggccgacgatgacgacgaccaccgga                                                                                                                         | 70                         | Cloning of <i>wolG2</i> into pBO1                      |
| pBO1_wolG2_R1 | cgaacgcacatcgattaattaaggaggacacatatggacgcccggcatcac                                                                                                                       |                            |                                                        |
| pCDF_wolF2_F1 | aagtataagaaggagatatacatatgtcgaaccggttcg                                                                                                                                   | 60                         | Cloning of <i>wolF2</i> into pCDFDuet-1                |
| pCDF_wolF2_R1 | ctcgagctcggtaaagaaacggtaccgtgtgacgagtggtg                                                                                                                                 |                            |                                                        |
| pET_wolG1_F1  | catcaccacagccaggatccgaatccgacgtacgcgagctcaacga                                                                                                                            | 62                         | Cloning of <i>wolG1A2</i> into pET28a(+)               |
| pET_wolG1_R1  | cttaagcattatgcggccgcaagcttttagatcacgcacgcctgggcca                                                                                                                         |                            |                                                        |
| pET_wolG2_F1  | catcaccacagccaggatccgaatccgaccttcgaggagctggaggc                                                                                                                           | 62                         | Cloning of <i>wolG2A2</i> into pET28a(+)               |
| pET_wolG2_R1  | cttaagcattatgcggccgcaagcttttacaccacggcctcgccacgt                                                                                                                          |                            |                                                        |
| pET_6595_F1   | catcaccacagccaggatccgaatcgcactacgccgaactggaagc                                                                                                                            | 60                         | Cloning of <i>orf6595A</i> into pET28a(+)              |
| pET_6595_R1   | cttaagcattatgcggccgcaagcttttagcggccagctccacaccct                                                                                                                          |                            |                                                        |
| pET-G2MP-1    | ggccaccgacaccaccgggc                                                                                                                                                      | 20                         | Cloning of <i>wolG2A2::RmoG</i> into pET- <i>wolG2</i> |
| pET-G2MP-2    | ccagccccagcagttcggcg                                                                                                                                                      | 20                         | Cloning of <i>wolG2A2::RmoG</i> into pET- <i>wolG2</i> |
| pET-G2MP-3    | gcccgggtggtgctgggtggcc                                                                                                                                                    | 20                         | Cloning of <i>wolG2A2::RmoG</i> into pET- <i>wolG2</i> |
| pET-G2MP-4    | cgccgaactgctggggctgg                                                                                                                                                      | 20                         | Cloning of <i>wolG2A2::RmoG</i> into pET- <i>wolG2</i> |

### 3. Supplementary References

1. Song, Y. *et al.* Cyclic Hexapeptides from the Deep South China Sea-Derived *Streptomyces scopuliridis* SCSIO ZJ46 Active Against Pathogenic Gram-Positive Bacteria. *Journal of Natural Products* **77**, 1937–1941 (2014).
2. Kaweewan, I., Komaki, H., Hemmi, H. & Kodani, S. Isolation and Structure Determination of New Antibacterial Peptide Curacomycin Based on Genome Mining. *Asian Journal of Organic Chemistry* **6**, 1838–1844 (2017).
3. Son, S. *et al.* Genomics-Driven Discovery of Chlorinated Cyclic Hexapeptides Ulleungmycins A and B from a *Streptomyces* Species. *J Nat Prod* **80**, 3025–3031 (2017).
4. Gilchrist, C. L. M. & Chooi, Y.-H. clinker & clustermap.js: automatic generation of gene cluster comparison figures. *Bioinformatics* **37**, 2473–2475 (2021).
5. Kuščer, E. *et al.* Roles of rapH and rapG in Positive Regulation of Rapamycin Biosynthesis in *Streptomyces hygroscopicus*. *Journal of Bacteriology* **189**, 4756–4763 (2007).
6. Schimming, O., Fleischhacker, F., Nollmann, F. I. & Bode, H. B. Yeast Homologous Recombination Cloning Leading to the Novel Peptides Ambactin and Xenolindicin. *ChemBioChem* **15**, 1290–1294 (2014).
7. Watzel, J., Hacker, C., Duchardt-Ferner, E., Bode, H. B. & Wöhnert, J. A New Docking Domain Type in the Peptide-Antimicrobial-Xenorhabdus Peptide Producing Nonribosomal Peptide Synthetase from *Xenorhabdus bovienii*. *ACS Chemical Biology* **15**, 982–989 (2020).
8. Price, M. N., Dehal, P. S. & Arkin, A. P. FastTree 2 - Approximately maximum-likelihood trees for large alignments. *PLoS ONE* **5**, (2010).
9. Larkin, M. A. *et al.* Clustal W and Clustal X version 2.0. *Bioinformatics* **23**, 2947–2948 (2007).
10. Ziemert, N. *et al.* The natural product domain seeker NaPDoS: A phylogeny based bioinformatic tool to classify secondary metabolite gene diversity. *PLoS ONE* **7**, (2012).
11. Conti, E., Stachelhaus, T., Marahiel, M. A. & Brick, P. Structural basis for the activation of phenylalanine in the non-ribosomal biosynthesis of gramicidin S. *EMBO J* **16**, 4174–83 (1997).
12. Kelley, L. A., Mezulis, S., Yates, C. M., Wass, M. N. & Sternberg, M. J. E. The Phyre2 web portal for protein modeling, prediction and analysis. *Nature Protocols* **10**, 845–858 (2015).
13. Tanovic, A., Samel, S. A., Essen, L.-O. & Marahiel, M. A. Crystal Structure of the Termination Module of a Nonribosomal Peptide Synthetase. *Science (1979)* **321**, 659–663 (2008).
14. Martin, D. & Rybicki, E. RDP: detection of recombination amongst aligned sequences. *Bioinformatics* **16**, 562–3 (2000).
15. Padidam, M., Sawyer, S. & Fauquet, C. M. Possible Emergence of New Geminiviruses by Frequent Recombination. *Virology* **265**, 218–225 (1999).
16. Salminen, M. O., Carr, J. K., Burke, D. S. & Mccutchan, F. E. Identification of Breakpoints in Intergenotypic Recombinants of HIV Type 1 by Bootscanning. *AIDS Research and Human Retroviruses* **11**, 1423–1425 (1995).
17. Smith, J. M. Analyzing the mosaic structure of genes. *J Mol Evol* **34**, 126–9 (1992).

18. Posada, D. & Crandall, K. A. Evaluation of methods for detecting recombination from DNA sequences: computer simulations. *Proc Natl Acad Sci U S A* **98**, 13757–62 (2001).
19. Gibbs, M. J., Armstrong, J. S. & Gibbs, A. J. Sister-scanning: a Monte Carlo procedure for assessing signals in recombinant sequences. *Bioinformatics* **16**, 573–82 (2000).
20. Holmes, E. C., Worobey, M. & Rambaut, A. Phylogenetic evidence for recombination in dengue virus. *Molecular Biology and Evolution* **16**, 405–409 (1999).
21. Gilchrist, C. L. M. *et al.* cblaster: a remote search tool for rapid identification and visualisation of homologous gene clusters. *Bioinformatics Advances* **1**, 1–10 (2021).
22. Medema, M. H. *et al.* Minimum Information about a Biosynthetic Gene cluster. *Nature Chemical Biology* **11**, 625–631 (2015).
23. Paget, M. S., Chamberlin, L., Atrih, A., Foster, S. J. & Buttner, M. J. Evidence that the extracytoplasmic function sigma factor sigmaE is required for normal cell wall structure in *Streptomyces coelicolor* A3(2). *J Bacteriol* **181**, 204–11 (1999).
24. Hanahan, D. *DNA Cloning: A Practical Approach*. (IRL Press, 1985).
25. Nijkamp, J. F. *et al.* De novo sequencing, assembly and analysis of the genome of the laboratory strain *Saccharomyces cerevisiae* CEN.PK113-7D, a model for modern industrial biotechnology. *Microbial Cell Factories* **11**, (2012).
