# Supplementary material for: Bifurcation drives the evolution of assembly-line biosynthesis
Source: Nat Commun. 2022 Jun 17;13:3498. doi: 10.1038/s41467-022-30950-z (PMC9205934; doi:10.1038/s41467-022-30950-z)
Supplement: Supplementary file 4 — Source Data [file 41467_2022_30950_MOESM4_ESM.xlsx]

## Sheet: Sheet1
Figure 5a
	WolG1A2			WolG2A2			RmoGA			Synthetic Recombinant
Substrate	1	2	3	1	2	3	1	2	3	1	2	3
A	-0.002	-0.002	0	0.001	0.002	0.001	-0.001	0.001	0	0.009	0.009	0.011
C	0	0	0.001	0	0.002	0.001	0	0	0.001	0.01	0.009	0.008
D	0.004	0.002	-0.001	0.008	0.006	0.008	-0.001	0	0.001	0.013	0.011	0.011
E	0.003	0.004	0	0.002	0.001	0.001	0.001	0	-0.001	0.012	0.014	0.016
F	-0.001	0	0	0	0	-0.002	0.005	-0.001	-0.001	0.007	0.007	0.009
G	0.026	0.025	0.019	0.003	0.002	0	0.041	0.061	0.035	0.066	0.073	0.074
H	0.002	0.003	0.003	0.002	0.004	0.005	0.004	0.001	0	0.011	0.012	0.011
I	-0.001	0	-0.002	0	-0.002	0	0.001	-0.001	-0.002	0.008	0.008	0.009
K	0.002	0	-0.001	0	0.001	0.001	0	-0.003	0.001	0.01	0.01	0.009
L	0.002	0.002	-0.001	0	-0.001	-0.002	0.001	0	0	0.009	0.011	0.008
M	0	0.001	-0.003	0	-0.001	0	0	-0.001	0	0.009	0.01	0.01
N	0.002	0.002	0	0.007	0.007	0.009	-0.001	0.008	0.003	0.017	0.016	0.018
O	0.005	0.003	-0.003	0.019	0.015	0.018	0.001	0.003	0.001	0.01	0.008	0.011
P	0.002	0.001	-0.002	0.001	0.001	0	0.004	0.001	0	0.01	0.01	0.01
Q	0.001	0.001	0	0.004	0.006	0.002	0.005	-0.001	-0.001	0.021	0.02	0.021
R	0.001	0.001	-0.001	0.002	0.004	0	0.004	0	0	0.008	0.009	0.01
S	0.001	0	-0.002	0.005	0.004	0.002	0	-0.001	0	0.012	0.009	0.011
T	0.002	0.002	-0.002	0.001	0.001	0	0.001	-0.001	0	0.012	0.01	0.01
V	0	0	-0.001	0.004	0.005	-0.003	0.001	-0.001	-0.002	0.011	0.01	0.006
W	0	0	0.001	0.001	0.002	-0.001	-0.002	0	-0.002	0.009	0.012	0.013
Y	-0.002	-0.001	0.001	0	0.001	0.003	0.001	0	-0.002	0.012	0.01	0.011
